# Supplementary material for: LC-MS based metabolomic profiling for renal cell carcinoma histologic subtypes
Source: PubMed Central journal article supplement (PMC6821699; doi:10.1038/s41598-019-52059-y), 2019-10-30
Supplement: 41598_2019_52059_MOESM1_ESM.pdf [file 41598_2019_52059_MOESM1_ESM.pdf]

## **LC-MS based metabolomic profiling for renal cell carcinoma histologic subtypes**

Lun Jing, Jean-Marie Guignonis, Delphine Borchellini, Matthieu Durand, Thierry Pourcher, and  
Damien Ambrosetti

**Supplementary information**

# Supplementary Figure 1

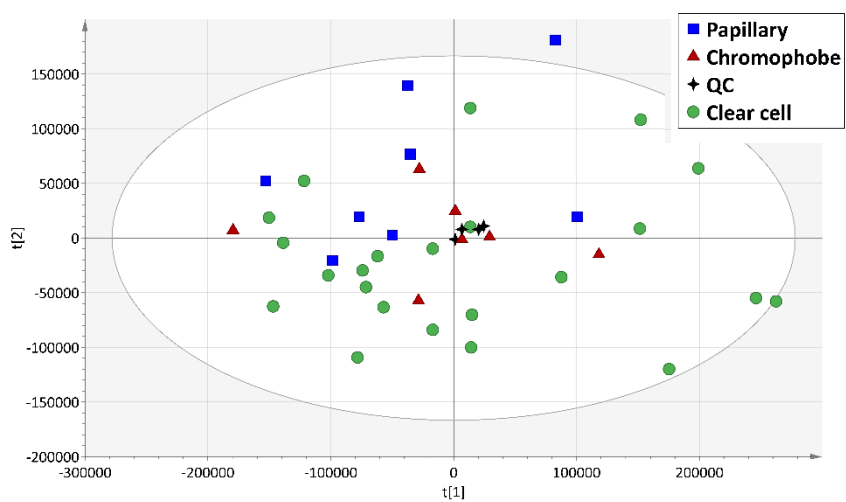

**Supplementary Figure 1. Principal component analysis (PCA) of RCC subtype based on untargeted metabolomics data.**

## Supplementary Figure 2

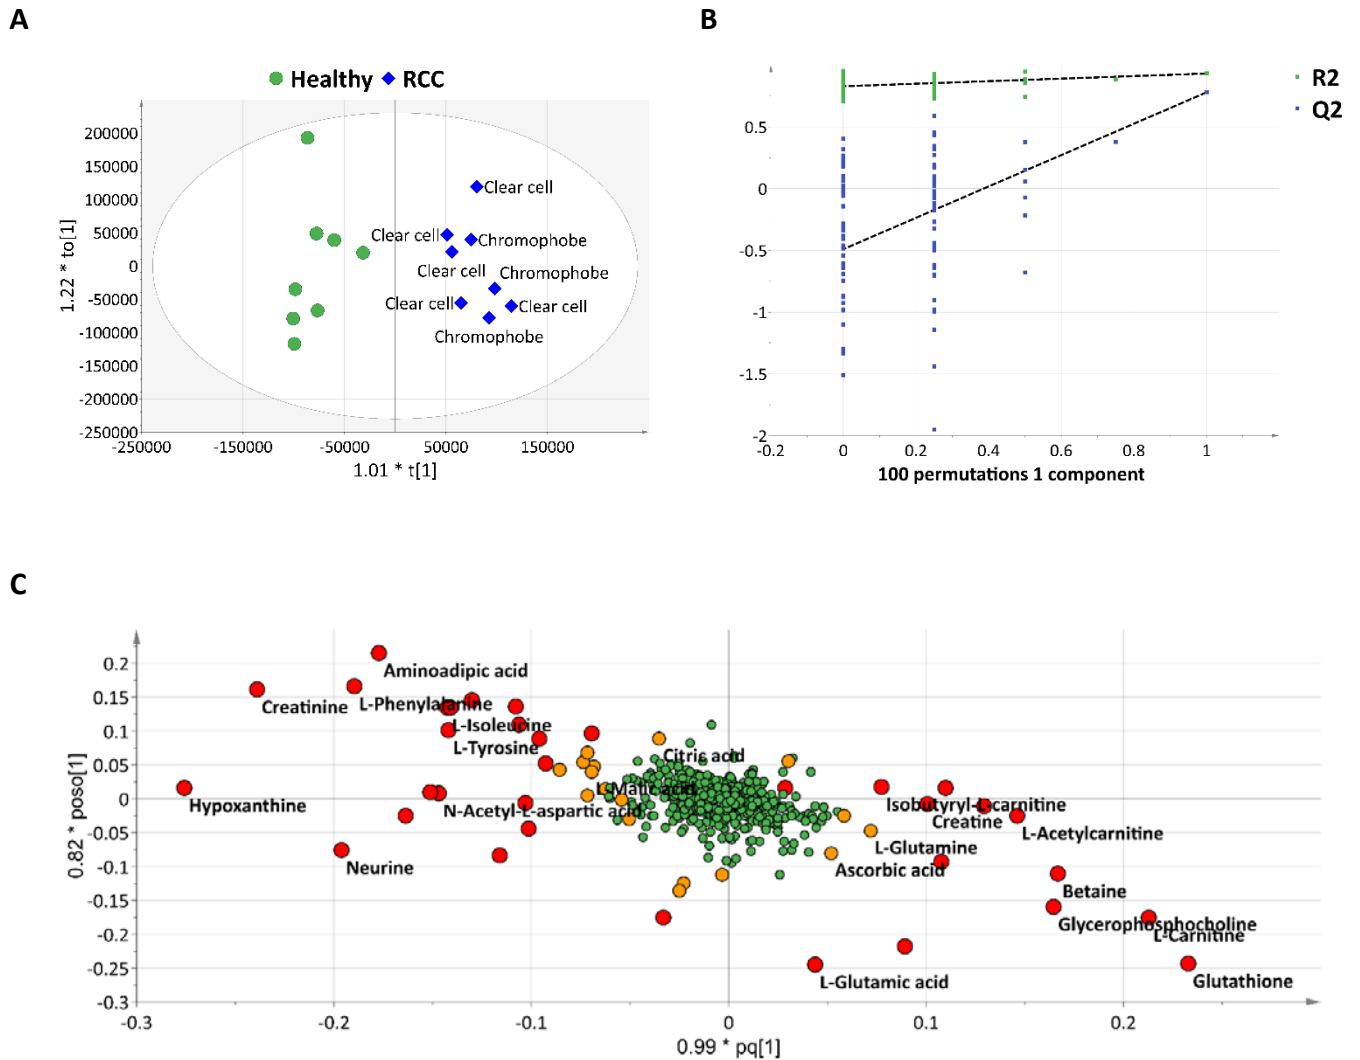

**Supplementary Figure 2. Discrimination between healthy controls and renal cell carcinomas based on untargeted metabolomics data. A. OPLS-DA analysis showing the discrimination between healthy control and carcinoma samples (8 matched pairs including 5 clear cell and 3 chromophobe). The model presents 1 predictive component, 2 orthogonal components,  $R^2X_{(cum)}$  of 55.5%, a goodness-of-fit  $R^2$  of 93.2%, a goodness-of-prediction  $Q^2$  of 78.0% and CV-ANOVA p-value of 0.015. B. Validation plot obtained from 100 permutation tests. C. Loading plot showing the most discriminative metabolites in normal and RCC tissue discrimination. The metabolites with VIP (Variable Importance for the Projection)  $> 3$  are highlighted with red circles; with  $VIP > 2$  are highlighted with orange circles.**

**Supplementary Table 1.** Variable influence on projection (VIP) for RCC subtype classification.

| Var ID (Primary)                                      | Var ID (row m/z) | Var ID (ID) | M3.VIP[2+1+0] |
|-------------------------------------------------------|------------------|-------------|---------------|
| Creatine                                              | 132.077          | HMDB00064   | 10,5111       |
| L-Acetylcarnitine                                     | 204.123          | HMDB00201   | 10,4271       |
| L-Carnitine                                           | 162.113          | HMDB00062   | 6,84946       |
| L-Proline                                             | 116.071          | HMDB00162   | 6,45495       |
| L-Phenylalanine                                       | 166.086          | HMDB00159   | 6,07172       |
| Dihydrothymine                                        | 129.066          | HMDB00079   | 5,16308       |
| Betaine                                               | 118.087          | HMDB00043   | 5,1483        |
| Hypoxanthine                                          | 137.046          | HMDB00157   | 5,10661       |
| L-Lactic acid                                         | 89.0229          | HMDB00190   | 4,99924       |
| L-Isoleucine                                          | 132.102          | HMDB00172   | 4,65421       |
| 5-Aminoimidazole ribonucleotide                       | 296.066          | HMDB01235   | 4,03263       |
| L-Methionine                                          | 150.058          | HMDB00696   | 3,89251       |
| Humulinic acid A                                      | 265.148          | HMDB30104   | 3,77026       |
| L-Tyrosine                                            | 182.081          | HMDB00158   | 3,69869       |
| L-Palmitoylcarnitine                                  | 400.343          | HMDB00222   | 3,6649        |
| Dimethylglycine                                       | 104.071          | HMDB00092   | 3,62773       |
| L-Tryptophan                                          | 205.097          | HMDB00929   | 3,40488       |
| Hydroxybutyrylcarnitine                               | 248.149          | HMDB13127   | 3,2158        |
| N-Acetyl-L-aspartic acid                              | 174.04           | HMDB00812   | 3,2133        |
| Adenosine                                             | 268.104          | HMDB00050   | 3,19064       |
| L-Malic acid                                          | 133.013          | HMDB00156   | 3,18659       |
| Isobutyryl-L-carnitine                                | 232.154          | HMDB00736   | 3,14472       |
| L-Glutamic acid                                       | 148.061          | HMDB00148   | 3,0703        |
| Glutathione                                           | 308.091          | HMDB00125   | 2,9841        |
| Glycerophosphocholine                                 | 258.11           | HMDB00086   | 2,96531       |
| trans-Hexadec-2-enoyl carnitine                       | 398.327          | HMDB06317   | 2,94701       |
| Tetradecanoylcarnitine                                | 372.311          | HMDB05066   | 2,89112       |
| Nalbuphine                                            | 358.201          | HMDB14982   | 2,82291       |
| Beta-Alanine                                          | 90.0555          | HMDB00056   | 2,76142       |
| Oleoylecarnitine                                      | 426.358          | HMDB05065   | 2,64926       |
| Neurine                                               | 104.107          | HMDB31259   | 2,56708       |
| Linoelaidyl carnitine                                 | 424.342          | HMDB06461   | 2,50077       |
| Amino adipic acid                                     | 162.076          | HMDB00510   | 2,47727       |
| Methylmalonic acid                                    | 117.018          | HMDB00202   | 2,42256       |
| Isoplumbagin                                          | 187.041          | HMDB35291   | 2,40383       |
| N-Desmethylvenlafaxine                                | 264.196          | HMDB13892   | 2,37449       |
| Cysteineglutathione disulfide                         | 214.051          | HMDB00656   | 2,36515       |
| Guanidoacetic acid                                    | 118.061          | HMDB00128   | 2,28672       |
| Indoleacrylic acid                                    | 188.071          | HMDB00734   | 2,27785       |
| Adenine                                               | 136.062          | HMDB00034   | 2,24758       |
| 2-Octenoylcarnitine                                   | 286.201          | HMDB13324   | 2,24301       |
| Adenosine monophosphate                               | 348.07           | HMDB00045   | 2,23197       |
| LysoPC(16:0)                                          | 496.34           | HMDB10382   | 2,19013       |
| Pyrrolidine                                           | 72.0814          | HMDB31641   | 2,13555       |
| Hexanoylcarnitine                                     | 260.186          | HMDB00705   | 2,06003       |
| N-a-Acetyl-L-arginine                                 | 217.129          | HMDB04620   | 2,03322       |
| L-1,2,3,4-Tetrahydro-beta-carboline-3-carboxylic acid | 217.097          | HMDB35665   | 1,97511       |
| Acetaminophen                                         | 152.071          | HMDB01859   | 1,95179       |
| Citramalic acid                                       | 147.029          | HMDB00426   | 1,92319       |
| cis-5-Tetradecenoylcarnitine                          | 370.295          | HMDB02014   | 1,88553       |
| Tyrosol 4-sulfate                                     | 110.02           | HMDB41785   | 1,85842       |
| N-Methylethanolaminium phosphate                      | 156.042          | HMDB60173   | 1,85049       |
| Niacinamide                                           | 123.056          | HMDB01406   | 1,83226       |
| Valganciclovir                                        | 353.161          | HMDB15548   | 1,80062       |

|                                                          |         |           |         |
|----------------------------------------------------------|---------|-----------|---------|
| 3-Hydroxy-11Z-octadecenoylcarnitine                      | 442.353 | HMDB13339 | 1,79403 |
| Galactonic acid                                          | 195.05  | HMDB00565 | 1,74207 |
| Spermidine                                               | 146.165 | HMDB01257 | 1,71571 |
| Imidazole acetol-phosphate                               | 111.021 | HMDB12236 | 1,70828 |
| Alnustone                                                | 263.146 | HMDB31664 | 1,67864 |
| Xanthine                                                 | 151.025 | HMDB00292 | 1,65658 |
| Pyridine N-oxide glucuronide                             | 273.084 | HMDB61177 | 1,65468 |
| PC-M6                                                    | 420.251 | HMDB38568 | 1,64902 |
| 3-Methyl sulfolene                                       | 133.032 | HMDB59667 | 1,64129 |
| p-Cresol sulfate                                         | 187.006 | HMDB11635 | 1,63924 |
| N6-Acetyl-L-lysine                                       | 189.124 | HMDB00206 | 1,61829 |
| Methoxsalen                                              | 215.032 | HMDB14693 | 1,61131 |
| Lidocaine                                                | 235.181 | HMDB14426 | 1,59592 |
| Dihydrouracil                                            | 115.051 | HMDB00076 | 1,59318 |
| Proline betaine                                          | 144.102 | HMDB04827 | 1,59157 |
| Taurine                                                  | 124.006 | HMDB00251 | 1,58823 |
| L-Lysine                                                 | 147.113 | HMDB00182 | 1,57718 |
| Dichloromethane                                          | 84.9603 | HMDB31548 | 1,56566 |
| Dodecanoylcarnitine                                      | 344.279 | HMDB02250 | 1,53279 |
| 2-O-Galloyl-1,4-galactarolactone                         | 343.026 | HMDB37199 | 1,51337 |
| N-Methylnicotinamide                                     | 137.071 | HMDB03152 | 1,46751 |
| Triethanolamine                                          | 150.113 | HMDB32538 | 1,43795 |
| N-Heptanoylglycine                                       | 188.128 | HMDB13010 | 1,43557 |
| Uric acid                                                | 167.02  | HMDB00289 | 1,43158 |
| 3-Hydroxyhexadecanoylcarnitine                           | 416.337 | HMDB13336 | 1,43105 |
| Piperidine                                               | 86.097  | HMDB34301 | 1,42661 |
| Glycerolphosphorylethanolamine                           | 214.048 | HMDB00114 | 1,41495 |
| PC(14:0/20:1(11Z))                                       | 760.584 | HMDB07879 | 1,41027 |
| Ribose-1-arsenate                                        | 272.959 | HMDB12285 | 1,40237 |
| 3(S)-hydroxy-13-cis-docosenoyl-CoA                       | 130.017 | HMDB62200 | 1,39011 |
| DL-2-Aminooctanoic acid                                  | 160.133 | HMDB00991 | 1,37792 |
| hydroxyisovaleroyl carnitine                             | 262.165 | HMDB62555 | 1,3641  |
| Isoleucyl-Isoleucine                                     | 245.186 | HMDB28910 | 1,35068 |
| LysoPE(0:0/18:1(11Z))                                    | 480.309 | HMDB11475 | 1,34772 |
| Diphenyl disulfide                                       | 219.027 | HMDB31823 | 1,34432 |
| Dehydroxizyleuton                                        | 111.039 | HMDB13970 | 1,32777 |
| Isoleucyl-Valine                                         | 231.17  | HMDB28920 | 1,32402 |
| Phenylpyruvic acid                                       | 165.055 | HMDB00205 | 1,29824 |
| Ascorbic acid                                            | 175.024 | HMDB00044 | 1,28794 |
| 3,5,3-triiodothyronine-4-sulfate                         | 129.02  | HMDB62205 | 1,28414 |
| 5'-Methylthioadenosine                                   | 298.097 | HMDB01173 | 1,27028 |
| Amoxapine                                                | 312.095 | HMDB14683 | 1,27022 |
| Diisopropyl sulfide                                      | 119.09  | HMDB29579 | 1,26252 |
| Selenium Sulfide                                         | 112.896 | HMDB15106 | 1,25687 |
| N2-Succinyl-L-ornithine                                  | 233.113 | HMDB01199 | 1,22232 |
| L-Kynurenine                                             | 209.092 | HMDB00684 | 1,21881 |
| N-Acetylarlyamine                                        | 136.076 | HMDB01250 | 1,19761 |
| 1-Oxo-1H-2-benzopyran-3-carboxaldehyde                   | 88.0237 | HMDB30577 | 1,19331 |
| 1-Pyrroline                                              | 70.0658 | HMDB12497 | 1,19245 |
| Hippuric acid                                            | 178.05  | HMDB00714 | 1,18142 |
| Dibenzyl disulfide                                       | 245.043 | HMDB32077 | 1,15664 |
| 3-hydroxyoctanoyl carnitine                              | 304.212 | HMDB61634 | 1,1535  |
| (2S,4R)-4-(9H-Pyrido[3,4-b]indol-1-yl)-1,2,4-butanetriol | 273.121 | HMDB35191 | 1,13778 |
| 1-(Isothiocyanatomethyl)-4-methoxybenzene                | 90.5264 | HMDB32581 | 1,12798 |
| Trigonelline                                             | 138.055 | HMDB00875 | 1,1251  |
| Ophthalmic acid                                          | 290.135 | HMDB05765 | 1,12354 |
| Gamma-Butyrolactone                                      | 87.0446 | HMDB00549 | 1,10032 |
| Thiolutin                                                | 226.996 | HMDB34228 | 1,09423 |
| 5-Hydroxyisourate                                        | 185.032 | HMDB30097 | 1,09399 |

|                                                                                           |         |           |          |
|-------------------------------------------------------------------------------------------|---------|-----------|----------|
| 9,12-Hexadecadienoylcarnitine                                                             | 396.311 | HMDB13334 | 1,09208  |
| Lenticin                                                                                  | 247.144 | HMDB61115 | 1,08828  |
| Aniline                                                                                   | 94.0656 | HMDB03012 | 1,08206  |
| L-argininium(1+)                                                                          | 176.128 | HMDB62762 | 1,08044  |
| Ethyl aconitate                                                                           | 203.053 | HMDB40275 | 1,07958  |
| 1-(4-Hydroxy-3-methoxyphenyl)-3-decanone                                                  | 279.192 | HMDB30801 | 1,07098  |
| LysoPC(18:1(9Z))                                                                          | 522.355 | HMDB02815 | 1,06414  |
| Inosine                                                                                   | 267.073 | HMDB00195 | 1,06232  |
| 2-Hydroxyadipic acid                                                                      | 161.044 | HMDB00321 | 1,0502   |
| Ureidopropionic acid                                                                      | 133.061 | HMDB00026 | 1,04489  |
| Pseudoecgonine                                                                            | 186.113 | HMDB06348 | 1,03703  |
| 3-Hydroxy-2-methyl-[R-(R,S)]-butanoic acid                                                | 117.054 | HMDB00351 | 1,03695  |
| Phosphodimethylethanolamine                                                               | 168.042 | HMDB60244 | 1,02397  |
| 3,4-Dihydroxymandelic acid                                                                | 185.042 | HMDB01866 | 1,02144  |
| Caffeine                                                                                  | 195.088 | HMDB01847 | 1,01403  |
| 3-Hydroxy-9-hexadecenoylcarnitine                                                         | 414.321 | HMDB13333 | 1,01221  |
| Valerenic acid                                                                            | 235.166 | HMDB30016 | 1,0086   |
| Creatinine                                                                                | 114.067 | HMDB00562 | 1,00418  |
| Uridine 5'-monophosphate                                                                  | 323.029 | HMDB00288 | 0,999177 |
| N-(4-hydroxyphenyl)ethoxycarbothioamide                                                   | 99.5316 | HMDB33179 | 0,966969 |
| 2,5-Dichloro-4-oxohex-2-enedioate                                                         | 226.952 | HMDB60363 | 0,955923 |
| 3-Hexenedioic acid                                                                        | 145.05  | HMDB00393 | 0,945752 |
| Propionylcarnitine                                                                        | 218.139 | HMDB00824 | 0,939206 |
| 2-Methyl-3-ketovaleric acid                                                               | 129.054 | HMDB00408 | 0,937506 |
| Pseudoephedrine                                                                           | 166.123 | HMDB01943 | 0,933523 |
| 2,5-Furandicarboxylic acid                                                                | 157.011 | HMDB04812 | 0,929247 |
| Salsoline-1-carboxylate                                                                   | 236.092 | HMDB13067 | 0,927692 |
| L-Arginine                                                                                | 175.119 | HMDB00517 | 0,900684 |
| 3-hydroxydecanoyl carnitine                                                               | 332.243 | HMDB61636 | 0,89175  |
| Phosphoric acid                                                                           | 96.9682 | HMDB02142 | 0,888322 |
| Fenamiphos                                                                                | 302.101 | HMDB31787 | 0,863479 |
| Spermine                                                                                  | 203.223 | HMDB01256 | 0,85868  |
| 2-Hydroxy-lauroylcarnitine                                                                | 360.275 | HMDB13164 | 0,858169 |
| Gravelliferone                                                                            | 297.153 | HMDB30729 | 0,845069 |
| L-Glutamine                                                                               | 147.077 | HMDB00641 | 0,842453 |
| L-Octanoylcarnitine                                                                       | 288.217 | HMDB00791 | 0,842017 |
| Cytidine                                                                                  | 242.08  | HMDB00089 | 0,836793 |
| Erythronic acid                                                                           | 135.029 | HMDB00613 | 0,836236 |
| 2-Methylbutyrylcarnitine                                                                  | 246.17  | HMDB00378 | 0,831544 |
| 12-Hydroxy-12-octadecanoylcarnitine                                                       | 444.369 | HMDB13154 | 0,830441 |
| Taurocholic acid                                                                          | 516.296 | HMDB00036 | 0,820824 |
| Isoelemicin                                                                               | 207.102 | HMDB29867 | 0,820639 |
| Dihydrolipoate                                                                            | 207.05  | HMDB12210 | 0,820224 |
| (alpha-D-mannosyl)7-beta-D-mannosyl-diacetylchitobiosyl-L-asparagine, isoform B (protein) | 234.961 | HMDB62252 | 0,817224 |
| Phosphoserine                                                                             | 186.016 | HMDB00272 | 0,811223 |
| 3-(3,4,5-Trimethoxyphenyl)propanoic acid                                                  | 239.092 | HMDB30254 | 0,808955 |
| Glutamylalanine                                                                           | 219.098 | HMDB03764 | 0,80435  |
| N-Methylcalystegine B2                                                                    | 188.092 | HMDB36604 | 0,77938  |
| Histidinyl-Isoleucine                                                                     | 267.144 | HMDB28888 | 0,778403 |
| Pipecolic acid                                                                            | 130.086 | HMDB00070 | 0,77376  |
| L-Threonine                                                                               | 120.066 | HMDB00167 | 0,773686 |
| Decanoylcarnitine                                                                         | 316.248 | HMDB00651 | 0,770765 |
| Ornithine                                                                                 | 133.097 | HMDB00214 | 0,758882 |
| Citric acid                                                                               | 191.019 | HMDB00094 | 0,75466  |
| 6-Methylquinoline                                                                         | 144.081 | HMDB33115 | 0,752539 |
| Durupcoside B                                                                             | 464.254 | HMDB30976 | 0,748659 |
| Succinyladenosine                                                                         | 384.115 | HMDB00912 | 0,746469 |
| N1-Acetylspermidine                                                                       | 188.176 | HMDB01276 | 0,74626  |

|                                                                 |         |           |          |
|-----------------------------------------------------------------|---------|-----------|----------|
| Cinitapride                                                     | 403.233 | HMDB15698 | 0,745467 |
| 3-(Acetylthio)-2-methylfuran                                    | 79.0185 | HMDB32160 | 0,741323 |
| 2-Pyrrolidinone                                                 | 86.0606 | HMDB02039 | 0,739414 |
| D-Glucose                                                       | 181.072 | HMDB00122 | 0,739399 |
| Isobutyrylglycine                                               | 146.081 | HMDB00730 | 0,735231 |
| Glucosamine-1P                                                  | 260.053 | HMDB01109 | 0,727695 |
| Gamma Glutamylglutamic acid                                     | 277.103 | HMDB11737 | 0,725478 |
| Phosphohydroxypyruvic acid                                      | 184.986 | HMDB01024 | 0,724684 |
| 2-Hydroxymyristoylcarnitine                                     | 388.306 | HMDB13166 | 0,720521 |
| Pyroglutamic acid                                               | 130.05  | HMDB00267 | 0,71765  |
| Flupenthixol                                                    | 437.193 | HMDB15013 | 0,704809 |
| L-Aspartic acid                                                 | 132.029 | HMDB00191 | 0,699801 |
| Hexanoylglycine                                                 | 172.097 | HMDB00701 | 0,698426 |
| cis-Aconitic acid                                               | 173.008 | HMDB00072 | 0,695489 |
| Homovanillic acid                                               | 181.05  | HMDB00118 | 0,6926   |
| Pentadecanoylcarnitine                                          | 386.326 | HMDB62517 | 0,689707 |
| 4-Guanidinobutanoic acid                                        | 146.093 | HMDB03464 | 0,689601 |
| Benzothiazole                                                   | 136.023 | HMDB32930 | 0,687216 |
| Glycine                                                         | 76.04   | HMDB00123 | 0,681152 |
| 3-Methylglutarylcarnitine                                       | 290.16  | HMDB00552 | 0,679099 |
| Ammonium peroxydisulfate                                        | 226.965 | HMDB37638 | 0,678327 |
| O-Demethylfonsecin                                              | 275.054 | HMDB33649 | 0,676863 |
| Deoxycytidine                                                   | 228.098 | HMDB00014 | 0,676779 |
| Indolelactic acid                                               | 204.066 | HMDB00671 | 0,676476 |
| LysoPC(18:3(6Z,9Z,12Z))                                         | 518.322 | HMDB10387 | 0,673194 |
| Zapotin                                                         | 343.115 | HMDB29461 | 0,669919 |
| 2-Hydroxybutyric acid                                           | 103.039 | HMDB00008 | 0,669885 |
| 4-Thialysine                                                    | 83.0381 | HMDB29178 | 0,663878 |
| Isoacitretin                                                    | 325.184 | HMDB03039 | 0,662896 |
| (S)-Isowillardiine                                              | 200.068 | HMDB30376 | 0,660535 |
| Norphthalmic acid                                               | 276.119 | HMDB05766 | 0,651114 |
| 5-Acetylamino-6-formylamino-3-methyluracil                      | 225.061 | HMDB11105 | 0,650626 |
| 3-Hydroxy-cis-5-tetradecenoylcarnitine                          | 386.29  | HMDB13330 | 0,650235 |
| Pantothenic acid                                                | 220.118 | HMDB00210 | 0,64752  |
| Meprobamate                                                     | 219.134 | HMDB14515 | 0,64715  |
| Methyl (9Z)-10'-oxo-6,10'-diapo-6-carotenoate                   | 311.169 | HMDB31976 | 0,644891 |
| 3, 5-Tetradecadiencarnitine                                     | 368.28  | HMDB13331 | 0,641433 |
| Benzoic acid                                                    | 123.044 | HMDB01870 | 0,638064 |
| 2-Hexenoylcarnitine                                             | 258.17  | HMDB13161 | 0,63459  |
| 1,3,5-Trihydroxy-10-methylacridone                              | 256.059 | HMDB41468 | 0,633363 |
| (S)-Metalaxyl                                                   | 280.154 | HMDB31802 | 0,626213 |
| 3-(3-Hydroxyphenyl)propanoic acid                               | 165.055 | HMDB00375 | 0,623728 |
| D-Erythrose 4-phosphate                                         | 201.016 | HMDB01321 | 0,622294 |
| L-isoleucyl-L-proline                                           | 229.155 | HMDB11174 | 0,621977 |
| 1-Butylamine                                                    | 74.0971 | HMDB31321 | 0,621876 |
| 3-Hydroxy-6,8-dimethoxy-7(11)-eremophilin-12,8-olide            | 309.174 | HMDB40756 | 0,619669 |
| LysoPC(18:0)                                                    | 524.371 | HMDB10384 | 0,618178 |
| L-Histidine                                                     | 154.061 | HMDB00177 | 0,612274 |
| Fumaric acid                                                    | 115.002 | HMDB00134 | 0,612105 |
| L-2-Amino-5-hydroxypentanoic acid                               | 134.081 | HMDB31658 | 0,608407 |
| Spermic acid 2                                                  | 233.15  | HMDB13075 | 0,607225 |
| Zymonic acid                                                    | 159.028 | HMDB31210 | 0,601689 |
| Homo-L-arginine                                                 | 189.135 | HMDB00670 | 0,601499 |
| 3,5,6-Trihydroxy-5-(hydroxymethyl)-2-methoxy-2-cyclohexen-1-one | 205.068 | HMDB41031 | 0,600432 |
| Pyridoxamine                                                    | 169.095 | HMDB01431 | 0,599498 |
| 2,3-Diaminosalicylic acid                                       | 169.059 | HMDB13159 | 0,594786 |
| 2-Furoylglycine                                                 | 170.042 | HMDB00439 | 0,590499 |
| Tetrahydropentoxylene                                           | 367.15  | HMDB29992 | 0,586858 |

|                                                                                                       |         |           |          |
|-------------------------------------------------------------------------------------------------------|---------|-----------|----------|
| N-Acetylneuraminic acid                                                                               | 308.099 | HMDB00230 | 0,583551 |
| Trifluoroacetic acid                                                                                  | 112.984 | HMDB14118 | 0,581749 |
| 4-Aminobiphenyl                                                                                       | 170.097 | HMDB13195 | 0,579898 |
| Dracunculin                                                                                           | 221.042 | HMDB30789 | 0,579183 |
| Fexofenadine                                                                                          | 500.279 | HMDB05030 | 0,576125 |
| 4-Methoxyphenylethanol sulfate                                                                        | 249.046 | HMDB29229 | 0,574918 |
| Pyruvic acid                                                                                          | 87.0073 | HMDB00243 | 0,573194 |
| 3'-Hydroxyhexobarbital                                                                                | 253.118 | HMDB13940 | 0,571425 |
| 2-Furancarboxaldehyde                                                                                 | 97.0289 | HMDB32914 | 0,570307 |
| Erinapyrone C                                                                                         | 187.058 | HMDB41026 | 0,568303 |
| Thiomorpholine 3-carboxylate                                                                          | 148.043 | HMDB59611 | 0,567885 |
| Phloretin                                                                                             | 273.08  | HMDB03306 | 0,567562 |
| Cedryl acetate                                                                                        | 265.212 | HMDB35910 | 0,567103 |
| Asymmetric dimethylarginine                                                                           | 203.15  | HMDB01539 | 0,564187 |
| Gamma-linolenyl carnitine                                                                             | 422.327 | HMDB06318 | 0,564083 |
| 4-Hydroxy-2-butenic acid gamma-lactone                                                                | 85.029  | HMDB32330 | 0,552483 |
| Sphingosine                                                                                           | 300.29  | HMDB00252 | 0,549955 |
| Fomepizole                                                                                            | 83.061  | HMDB15344 | 0,539807 |
| Histamine                                                                                             | 112.087 | HMDB00870 | 0,533286 |
| Mitotane                                                                                              | 316.948 | HMDB14786 | 0,532122 |
| Xanthosine                                                                                            | 283.068 | HMDB00299 | 0,529921 |
| Arginyl-Proline                                                                                       | 272.172 | HMDB28717 | 0,529196 |
| Glyoxylic acid                                                                                        | 72.9916 | HMDB00119 | 0,526732 |
| 1-Arachidonoylglycerophosphoinositol                                                                  | 619.289 | HMDB61690 | 0,523828 |
| 5-Hydroxymethyl-4-methyluracil                                                                        | 157.061 | HMDB00544 | 0,521406 |
| 3-Methylene-indolenine                                                                                | 130.063 | HMDB11664 | 0,520481 |
| Octadecanamide                                                                                        | 284.295 | HMDB34146 | 0,519262 |
| Oxoglutaric acid                                                                                      | 147.031 | HMDB00208 | 0,510612 |
| Quinone                                                                                               | 109.029 | HMDB03364 | 0,510298 |
| Arabinonic acid                                                                                       | 165.039 | HMDB00539 | 0,510254 |
| Monoisobutyl phthalic acid                                                                            | 223.097 | HMDB02056 | 0,509122 |
| Sphinganine                                                                                           | 302.305 | HMDB00269 | 0,504593 |
| L-beta-aspartyl-L-leucine                                                                             | 247.129 | HMDB11166 | 0,504166 |
| Acetyl-N-formyl-5-methoxykynurenamine                                                                 | 263.104 | HMDB04259 | 0,502465 |
| Aspartyl-Histidine                                                                                    | 269.088 | HMDB28755 | 0,499879 |
| Erythro-5-hydroxy-L-lysiniun(1+)                                                                      | 164.117 | HMDB62570 | 0,499849 |
| Deoxyinosine                                                                                          | 251.077 | HMDB00071 | 0,498243 |
| trans-2-Dodecenoylcarnitine                                                                           | 342.264 | HMDB13326 | 0,496868 |
| (ent-2b,4S,9a)-2,4,9-Trihydroxy-10(14)-oplopen-3-one 2-(2-methylbutanoate) 9-(3-methyl-2E-pentenoate) | 449.287 | HMDB40993 | 0,496129 |
| Cinnamic acid                                                                                         | 149.06  | HMDB00567 | 0,495998 |
| (S)-3,4-Dihydroxybutyric acid                                                                         | 119.034 | HMDB00337 | 0,495077 |
| Thorium                                                                                               | 233.042 | HMDB29215 | 0,495014 |
| S-Acetyldihydrolipoamide                                                                              | 250.094 | HMDB01526 | 0,494141 |
| Asparaginyln-Isoleucine                                                                               | 246.145 | HMDB28734 | 0,493467 |
| 5,6,7,8-Tetrahydro-4-methylquinoline                                                                  | 148.112 | HMDB29709 | 0,491869 |
| 4-Pyridoxic acid                                                                                      | 184.058 | HMDB00017 | 0,48913  |
| Tiglylcarnitine                                                                                       | 244.154 | HMDB02366 | 0,483509 |
| Formiminoglutamic acid                                                                                | 173.056 | HMDB00854 | 0,482806 |
| Orotidine                                                                                             | 287.052 | HMDB00788 | 0,478949 |
| N-(3-Methylbutyl)acetamide                                                                            | 116.107 | HMDB31651 | 0,478408 |
| (1R,3R,4R,5S,6S,8x)-1-Acetoxy-8-angeloyloxy-3,4-epoxy-5-hydroxy-7(14),10-bisaboladien-2-one           | 405.192 | HMDB39971 | 0,475249 |
| N-Acetylvanilalanine                                                                                  | 252.088 | HMDB11716 | 0,474226 |
| Methocarbamol                                                                                         | 242.1   | HMDB14567 | 0,472488 |
| Methionyl-Threonine                                                                                   | 251.103 | HMDB28983 | 0,47117  |
| 2-Aminomuconic acid                                                                                   | 158.045 | HMDB01241 | 0,469803 |
| Uracil                                                                                                | 113.035 | HMDB00300 | 0,468658 |
| N'-Formylkynurenine                                                                                   | 237.087 | HMDB01200 | 0,462608 |



|                                                           |         |           |          |
|-----------------------------------------------------------|---------|-----------|----------|
| 2,4,6-Octatriyn-1-ol                                      | 119.049 | HMDB30968 | 0,459115 |
| Chlorohydrin                                              | 109.023 | HMDB35190 | 0,458711 |
| 2,8-Dihydroxyadenine                                      | 166.038 | HMDB00401 | 0,458449 |
| Isoprothiolane                                            | 291.07  | HMDB31779 | 0,457873 |
| Glutaryl glycine                                          | 188.056 | HMDB00590 | 0,457184 |
| 3-Dehydroxycarnitine                                      | 146.118 | HMDB06831 | 0,454728 |
| 1-Methylhistidine                                         | 170.093 | HMDB00001 | 0,452375 |
| 5-Aminopentanal                                           | 102.092 | HMDB12815 | 0,45122  |
| Dihydro-4-mercapto-3(2H)-furanone                         | 119.016 | HMDB39786 | 0,45094  |
| N-Ornithyl-L-aurine                                       | 240.102 | HMDB33519 | 0,449861 |
| 6-Feruloylglucose 2,3,4-trihydroxy-3-methylbutylglycoside | 238.091 | HMDB36214 | 0,447969 |
| Aspartyl-L-proline                                        | 231.098 | HMDB02335 | 0,446086 |
| 3-Sulfinoalanine                                          | 152.001 | HMDB00996 | 0,445549 |
| Glycerol 3-phosphate                                      | 171.005 | HMDB00126 | 0,440815 |
| Coumarin                                                  | 147.044 | HMDB01218 | 0,438759 |
| Prostaglandin F1a                                         | 357.262 | HMDB02685 | 0,438351 |
| Glycyl-Phenylalanine                                      | 223.108 | HMDB28848 | 0,438265 |
| N-Acetylornithine                                         | 175.108 | HMDB03357 | 0,437715 |
| Succinic anhydride                                        | 101.024 | HMDB32523 | 0,436918 |
| Lofexidine                                                | 257.028 | HMDB15606 | 0,43447  |
| Trifluoromethyl-bismethyl ketone                          | 71.0298 | HMDB61928 | 0,43216  |
| Pyridine                                                  | 80.0501 | HMDB00926 | 0,431432 |
| Kamahine C                                                | 267.124 | HMDB38935 | 0,426584 |
| Vorinostat                                                | 265.155 | HMDB15568 | 0,42391  |
| (S)C(S)S-Methylcysteine sulfoxide                         | 152.036 | HMDB29432 | 0,419726 |
| Trimethylamine N-oxide                                    | 76.0764 | HMDB00925 | 0,418566 |
| Glycylprolylhydroxyproline                                | 286.144 | HMDB02171 | 0,418389 |
| 2-Hydroxy-3-methylpentanoic acid                          | 131.07  | HMDB00317 | 0,415475 |
| 3-Hydroxyhexadecadienoylcarnitine                         | 412.306 | HMDB13335 | 0,41402  |
| 2,2-dichloro-1,1-ethanediol                               | 130.965 | HMDB62193 | 0,411393 |
| 13-L-Hydroperoxylinoleic acid                             | 313.237 | HMDB03871 | 0,410271 |
| 1-(2,3-Dihydro-1H-pyrrolizin-5-yl)-1,4-pentanedione       | 206.117 | HMDB40046 | 0,409167 |
| Glutaconic acid                                           | 129.018 | HMDB00620 | 0,406239 |
| Canrenone                                                 | 339.2   | HMDB03033 | 0,405598 |
| Glycylproline                                             | 173.092 | HMDB00721 | 0,40499  |
| 2-Ketobutyric acid                                        | 101.023 | HMDB00005 | 0,40331  |
| 5-Hydroxylysine                                           | 163.11  | HMDB00450 | 0,401736 |
| Magnesium Sulfate                                         | 118.929 | HMDB14791 | 0,400846 |
| Toxin T2 tetrol                                           | 299.148 | HMDB36159 | 0,397572 |
| L-Agaridoxin                                              | 255.098 | HMDB29445 | 0,397471 |
| Indoxyl sulfate                                           | 212.002 | HMDB00682 | 0,396788 |
| 1-Isothiocyanatobutane                                    | 116.053 | HMDB31328 | 0,394638 |
| Alanyl-Proline                                            | 187.108 | HMDB28695 | 0,39459  |
| N-Acetylhistidine                                         | 196.074 | HMDB32055 | 0,392507 |
| L-gamma-glutamyl-L-isooleucine                            | 261.145 | HMDB11170 | 0,391282 |
| 1-Methyladenosine                                         | 282.119 | HMDB03331 | 0,391124 |
| Liqcoumarin                                               | 217.048 | HMDB29518 | 0,389805 |
| (1'R)-Nepetalic acid                                      | 185.115 | HMDB36117 | 0,388907 |
| 1,3,11-Tridecatriene-5,7,9-triyne                         | 167.084 | HMDB34294 | 0,38854  |
| N-Stearoyl tyrosine                                       | 448.342 | HMDB62343 | 0,386684 |
| Hexylamine                                                | 102.128 | HMDB32323 | 0,38591  |
| Arachidonic acid                                          | 305.247 | HMDB01043 | 0,383897 |
| Benzaldehyde                                              | 107.05  | HMDB06115 | 0,381844 |
| 3a,7a,12b-Trihydroxy-5b-cholanoic acid                    | 407.284 | HMDB00312 | 0,379739 |
| 2-Diethylaminoethanol                                     | 118.123 | HMDB33971 | 0,379062 |
| Castavinol                                                | 549.168 | HMDB29808 | 0,378224 |
| Allixin                                                   | 227.126 | HMDB40705 | 0,375349 |
| L-Serine                                                  | 104.034 | HMDB00187 | 0,374837 |
| Aldosterone                                               | 361.201 | HMDB00037 | 0,374241 |

|                                                     |         |           |          |
|-----------------------------------------------------|---------|-----------|----------|
| 1-Isothiocyanato-3-phenylpropane                    | 176.055 | HMDB38444 | 0,373976 |
| (2R,3R,4R)-2-Amino-4-hydroxy-3-methylpentanoic acid | 148.097 | HMDB29449 | 0,37193  |
| Glyceric acid                                       | 105.018 | HMDB00139 | 0,368375 |
| S-(Allylthio)-L-cysteine                            | 194.033 | HMDB38669 | 0,367234 |
| 5-Hydroxyindoleacetic acid                          | 192.065 | HMDB00763 | 0,365973 |
| 3-Hydroxycapric acid                                | 187.133 | HMDB02203 | 0,364507 |
| Putrescine                                          | 89.1079 | HMDB01414 | 0,362615 |
| 4'-Hydroxyclobazam                                  | 315.059 | HMDB60771 | 0,362492 |
| Urocanic acid                                       | 139.05  | HMDB00301 | 0,360576 |
| S-Cysteinosuccinic acid                             | 236.023 | HMDB29418 | 0,360406 |
| N-lactoyl-Tryptophan                                | 275.104 | HMDB62178 | 0,36011  |
| Lucidenic acid M                                    | 463.303 | HMDB35973 | 0,359889 |
| Wasalexin A                                         | 293.043 | HMDB34765 | 0,359524 |
| Emtricitabine                                       | 246.038 | HMDB15017 | 0,359008 |
| Phenylalanylphenylalanine                           | 313.154 | HMDB13302 | 0,358407 |
| 8-Hydroxy-5,6-octadienoic acid                      | 157.084 | HMDB31101 | 0,355539 |
| N-Acetylputrescine                                  | 131.118 | HMDB02064 | 0,352938 |
| Sinapyl alcohol                                     | 211.097 | HMDB13070 | 0,352875 |
| 5-Hydroxy-2-furoic acid                             | 127.002 | HMDB59784 | 0,35205  |
| Oxalosuccinic acid                                  | 189.002 | HMDB03974 | 0,35019  |
| (-)-erythro-Anethole glycol 1-glucoside             | 343.14  | HMDB33066 | 0,349764 |
| Lysyl-Tryptophan                                    | 331.176 | HMDB28962 | 0,348595 |
| Cytosine                                            | 112.051 | HMDB00630 | 0,348285 |
| 1,3,7-Trimethyluric acid                            | 209.066 | HMDB02123 | 0,347447 |
| Dihydrovaltrate                                     | 425.215 | HMDB34492 | 0,346613 |
| Indole                                              | 118.065 | HMDB00738 | 0,346375 |
| 7-Hydroxyoctanoic acid                              | 159.102 | HMDB00486 | 0,34637  |
| Gerberinol                                          | 365.105 | HMDB33304 | 0,345033 |
| Pirbuterol                                          | 241.155 | HMDB15407 | 0,34433  |
| Prazepam                                            | 325.113 | HMDB15527 | 0,342993 |
| 4-Hydroxyproline                                    | 132.066 | HMDB00725 | 0,342562 |
| LysoPC(20:4(5Z,8Z,11Z,14Z))                         | 544.339 | HMDB10395 | 0,340499 |
| Phthalic acid                                       | 167.032 | HMDB02107 | 0,338523 |
| 2-Acetylthiazole                                    | 126.002 | HMDB32964 | 0,336651 |
| Carissanol                                          | 377.157 | HMDB30081 | 0,336136 |
| Dimethylallylpyrophosphate                          | 247.013 | HMDB01120 | 0,335953 |
| 3-Dehydroquinate                                    | 189.04  | HMDB12710 | 0,335825 |
| Uridine                                             | 245.077 | HMDB00296 | 0,335794 |
| Finasteride                                         | 187.144 | HMDB01984 | 0,335347 |
| 2-phosphonato-D-glycerate(3-)                       | 181.965 | HMDB62707 | 0,335038 |
| Deoxycholic acid glycine conjugate                  | 448.307 | HMDB00631 | 0,334603 |
| (S)-Reticuline                                      | 330.17  | HMDB03601 | 0,333141 |
| Vanillactic acid                                    | 213.075 | HMDB00913 | 0,331174 |
| 3-Hydroxy-2-methylpyridine-4,5-dicarboxylate        | 196.028 | HMDB06955 | 0,329989 |
| GlutaminyI-Isoleucine                               | 260.161 | HMDB28800 | 0,328322 |
| 1-Isothiocyanato-7-(methylthio)heptane              | 204.087 | HMDB38440 | 0,326609 |
| S-(2-carboxypropyl)-Cysteamine                      | 164.074 | HMDB02169 | 0,322331 |
| Palmitoyl glucuronide                               | 419.301 | HMDB10331 | 0,321019 |
| N-Acetylserotonin                                   | 219.113 | HMDB01238 | 0,320448 |
| Norfuraneol                                         | 113.023 | HMDB31859 | 0,320244 |
| Cyanidin-3-galactoside                              | 243.045 | HMDB29195 | 0,319348 |
| AsparaginyI-Proline                                 | 230.114 | HMDB28739 | 0,317168 |
| Heptanoylcarnitine                                  | 274.201 | HMDB13238 | 0,317044 |
| (+)-2,3-Dihydro-3-methyl-1H-pyrrole                 | 84.0814 | HMDB33529 | 0,316943 |
| Androsterone sulfate                                | 369.174 | HMDB02759 | 0,316472 |
| Modafinil                                           | 274.092 | HMDB14883 | 0,314921 |
| Indane                                              | 119.086 | HMDB59837 | 0,312361 |
| 3',4'-Dihydrodiol                                   | 287.1   | HMDB13895 | 0,312263 |
| Dezocine                                            | 246.182 | HMDB15340 | 0,311838 |

|                                                                 |         |           |          |
|-----------------------------------------------------------------|---------|-----------|----------|
| 2,6-Dimethoxy-4-methylphenol                                    | 169.086 | HMDB29680 | 0,311386 |
| Loxapine                                                        | 326.109 | HMDB14552 | 0,311283 |
| N-acetyltryptophan                                              | 245.093 | HMDB13713 | 0,308575 |
| Vinylacetylglycine                                              | 144.066 | HMDB00894 | 0,30738  |
| Serinyl-Valine                                                  | 205.119 | HMDB29052 | 0,306301 |
| Dicumarol                                                       | 335.061 | HMDB14411 | 0,306187 |
| Epinephrine                                                     | 184.095 | HMDB00068 | 0,306155 |
| Tranexamic Acid                                                 | 158.118 | HMDB14447 | 0,305513 |
| L-cysteine Hydrochloride                                        | 158.003 | HMDB62799 | 0,305171 |
| Stearyl citrate                                                 | 445.314 | HMDB32521 | 0,305126 |
| 2-Methylbutyrylglycine                                          | 158.081 | HMDB00339 | 0,304747 |
| Phenol                                                          | 95.0497 | HMDB00228 | 0,304618 |
| Amyl 2-furoate                                                  | 183.102 | HMDB29456 | 0,303357 |
| 2-Methylcitric acid                                             | 207.051 | HMDB00379 | 0,303316 |
| Prolyl-Threonine                                                | 217.118 | HMDB29027 | 0,301516 |
| N-Acetylgalactosamine                                           | 220.082 | HMDB00212 | 0,299517 |
| Amidosulfonic acid                                              | 97.9918 | HMDB34830 | 0,298202 |
| 2-Hydroxyethanesulfonate                                        | 124.99  | HMDB03903 | 0,296578 |
| Pravastatin                                                     | 425.25  | HMDB05022 | 0,296109 |
| Dehydroepiandrosterone sulfate                                  | 367.158 | HMDB01032 | 0,296044 |
| 2,4-Hexadienyl acetate                                          | 141.091 | HMDB32311 | 0,294837 |
| Ascorbigen                                                      | 304.08  | HMDB29839 | 0,294199 |
| Ornithinium(1+)                                                 | 134.106 | HMDB62718 | 0,292581 |
| L,L-Cyclo(leucylprolyl)                                         | 211.144 | HMDB34276 | 0,291363 |
| 5-hydroxy-2-oxo-4-ureido-2,5-dihydro-1H-imidazole-5-carboxylate | 203.04  | HMDB59663 | 0,289736 |
| Casimiroin                                                      | 232.059 | HMDB33349 | 0,289574 |
| p-Cresol glucuronide                                            | 285.1   | HMDB11686 | 0,289249 |
| LysoPE(0:0/20:1(11Z))                                           | 508.34  | HMDB11482 | 0,288256 |
| Diflubenzuron                                                   | 311.04  | HMDB31778 | 0,286856 |
| Isepamicin                                                      | 570.306 | HMDB41911 | 0,286776 |
| Monoethyl malonic acid                                          | 131.034 | HMDB00576 | 0,28644  |
| N,N-Dimethylaniline                                             | 122.097 | HMDB01020 | 0,285125 |
| 2-Isopropyl-3,5-dimethoxy-6-methylpyrazine                      | 197.129 | HMDB29741 | 0,284175 |
| 3-Ethylpyridine                                                 | 108.081 | HMDB29734 | 0,283244 |
| Acetylcarnosine                                                 | 269.126 | HMDB12881 | 0,281354 |
| 5,8-Dihydro-6-(4-methyl-3-pentenyl)-1,2,3,4-tetrathiocin        | 265.023 | HMDB38142 | 0,281278 |
| 1,3-Dimethyluracil                                              | 141.066 | HMDB02144 | 0,280609 |
| 3-Methoxybenzenepropanoic acid                                  | 181.086 | HMDB11751 | 0,280179 |
| Hexobarbital                                                    | 237.123 | HMDB15444 | 0,279731 |
| Cadmium                                                         | 112.895 | HMDB03638 | 0,279502 |
| N-Acetyl-L-phenylalanine                                        | 206.082 | HMDB00512 | 0,279186 |
| Arachidyl carnitine                                             | 456.406 | HMDB06460 | 0,278713 |
| Phenol sulphate                                                 | 172.99  | HMDB60015 | 0,278286 |
| Diethanolamine                                                  | 106.087 | HMDB04437 | 0,277395 |
| 3-Hydroxydodecanoic acid                                        | 215.165 | HMDB00387 | 0,27675  |
| L-Aspartyl-L-phenylalanine                                      | 281.113 | HMDB00706 | 0,276261 |
| 3-Methylindole                                                  | 132.081 | HMDB00466 | 0,275242 |
| Diaminopimelic acid                                             | 191.103 | HMDB01370 | 0,274496 |
| Hydroxyprolyl-Isoleucine                                        | 243.135 | HMDB28866 | 0,274441 |
| p-Mentha-1,3,5,8-tetraene                                       | 133.099 | HMDB29641 | 0,274131 |
| N-Acetylgalactosamine 4-sulphate                                | 300.04  | HMDB00781 | 0,273081 |
| Ribothymidine                                                   | 259.093 | HMDB00884 | 0,272365 |
| 3-Methyladipic acid                                             | 159.065 | HMDB00555 | 0,271209 |
| (9E)-10-nitrooctadecenoic Acid                                  | 328.248 | HMDB62737 | 0,271009 |
| 9-Decenoylcarnitine                                             | 314.233 | HMDB13205 | 0,27079  |
| Leucyl-phenylalanine                                            | 277.156 | HMDB13243 | 0,270493 |
| Acrylamide                                                      | 72.0451 | HMDB04296 | 0,268104 |
| Homocysteine                                                    | 136.043 | HMDB00742 | 0,267061 |

|                                                                          |         |           |          |
|--------------------------------------------------------------------------|---------|-----------|----------|
| D-Alanyl-D-alanine                                                       | 161.092 | HMDB03459 | 0,265271 |
| 4-Ethylphenol                                                            | 123.081 | HMDB29306 | 0,262775 |
| Nadolol                                                                  | 310.201 | HMDB15334 | 0,261697 |
| Isoleucyl-Tyrosine                                                       | 295.165 | HMDB28919 | 0,260683 |
| Alanyl-Hydroxyproline                                                    | 203.103 | HMDB28688 | 0,260491 |
| Dethiobiotin                                                             | 215.139 | HMDB03581 | 0,259775 |
| Cubebinone                                                               | 429.154 | HMDB33259 | 0,259438 |
| Homoarecoline                                                            | 170.118 | HMDB38321 | 0,259189 |
| Propionic acid                                                           | 75.0447 | HMDB00237 | 0,259055 |
| Progabide                                                                | 335.095 | HMDB14975 | 0,258801 |
| 2-Piperidinone                                                           | 100.076 | HMDB11749 | 0,257056 |
| Carbidopa                                                                | 245.113 | HMDB14336 | 0,256853 |
| N(6)-Methyllysine                                                        | 161.129 | HMDB02038 | 0,256725 |
| Oleamide                                                                 | 282.279 | HMDB02117 | 0,256174 |
| N-Acetyl-L-tyrosine                                                      | 222.077 | HMDB00866 | 0,255833 |
| 4-Methyl-1-phenyl-2-pentanone                                            | 177.128 | HMDB31569 | 0,254456 |
| Glutarylcarntine                                                         | 276.144 | HMDB13130 | 0,25366  |
| Cytidine monophosphate                                                   | 322.045 | HMDB00095 | 0,253618 |
| 2-Octenedioic acid                                                       | 173.079 | HMDB00341 | 0,252851 |
| Carbenicillin                                                            | 377.086 | HMDB14717 | 0,251365 |
| 5-Methylthioribose 1-phosphate                                           | 259.001 | HMDB00963 | 0,250569 |
| Garcinia acid                                                            | 207.012 | HMDB31159 | 0,250457 |
| 2-[(5-Methylsulfinyl)-4-penten-2-ynylidene]-1,6-dioxaspiro[4.4]non-3-ene | 249.062 | HMDB32670 | 0,24969  |
| Phenylglyoxylic acid                                                     | 151.039 | HMDB01587 | 0,249049 |
| Methyl methanethiosulfonate                                              | 126.99  | HMDB31832 | 0,248106 |
| Bergaptol                                                                | 203.032 | HMDB13679 | 0,246743 |
| Pyrocatechol                                                             | 111.044 | HMDB00957 | 0,246244 |
| 2-Methylglutaric acid                                                    | 145.049 | HMDB00422 | 0,245382 |
| 1,2,3-Trihydroxybenzene                                                  | 125.023 | HMDB13674 | 0,244881 |
| 7-Hydroxy-5-(4-hydroxy-2-oxopentyl)-2-methylchromone 7-glucoside         | 437.143 | HMDB34698 | 0,244154 |
| 2,6-Diamino-4-hydroxy-5-N-methylformamidopyrimidine                      | 184.085 | HMDB11657 | 0,24338  |
| Phenmetrazine                                                            | 178.123 | HMDB14968 | 0,243214 |
| Citrulline                                                               | 176.103 | HMDB00904 | 0,242819 |
| 2-Propanoylthiazole                                                      | 142.034 | HMDB37168 | 0,242759 |
| Losartan                                                                 | 421.156 | HMDB14816 | 0,242277 |
| Allantoic acid                                                           | 177.061 | HMDB01209 | 0,241871 |
| Quinic acid                                                              | 191.055 | HMDB03072 | 0,241834 |
| N6,N6,N6-Trimethyl-L-lysine                                              | 189.16  | HMDB01325 | 0,241787 |
| D-Xylose                                                                 | 149.044 | HMDB00098 | 0,241732 |
| 2-Hydroxymyristic acid                                                   | 243.196 | HMDB02261 | 0,241378 |
| 6-Keto-decanoylcarnitine                                                 | 330.227 | HMDB13202 | 0,240373 |
| Lead                                                                     | 206.972 | HMDB04628 | 0,240216 |
| Cyclohexylamine                                                          | 100.112 | HMDB31404 | 0,239036 |
| D-1-Piperideine-2-carboxylic acid                                        | 128.071 | HMDB01084 | 0,238865 |
| N1-Methyl-2-pyridone-5-carboxamide                                       | 153.066 | HMDB04193 | 0,238556 |
| 1,2-Diacylglycerol-LD-PI-pool                                            | 120.045 | HMDB62270 | 0,2381   |
| 7a,12a-Dihydroxy-3-oxo-4-cholenoic acid                                  | 405.261 | HMDB00447 | 0,237956 |
| Dexfenfluramine                                                          | 232.129 | HMDB15322 | 0,237587 |
| 6,7-Dimethyl-8-(1-D-ribityl)lumazine                                     | 164.067 | HMDB03826 | 0,236985 |
| Shikimic acid                                                            | 175.058 | HMDB03070 | 0,236885 |
| Mukonidine                                                               | 242.079 | HMDB30214 | 0,236556 |
| Isosakuranin                                                             | 447.135 | HMDB29481 | 0,235884 |
| Ethyl trans-p-methoxycinnamate                                           | 205.086 | HMDB30762 | 0,235821 |
| 3-Hydroxy-5, 8-tetradecadiencarnitine                                    | 384.274 | HMDB13332 | 0,235552 |
| Androsterone glucuronide                                                 | 234.132 | HMDB02829 | 0,234673 |
| Cotinine methonium ion                                                   | 192.123 | HMDB01365 | 0,234654 |
| 2-Phosphoglyceric acid                                                   | 184.985 | HMDB00362 | 0,234443 |

|                                                                                         |         |           |          |
|-----------------------------------------------------------------------------------------|---------|-----------|----------|
| Alpha-CEHC                                                                              | 279.159 | HMDB01518 | 0,2343   |
| 2,3,5-Trimethylfuran                                                                    | 111.081 | HMDB29721 | 0,234157 |
| beta-D-3-[5-Deoxy-5-(dimethylarsinyl)ribofuranosyloxy]-2-hydroxy-1-propanesulfonic acid | 391.001 | HMDB32686 | 0,233566 |
| Choline                                                                                 | 105.114 | HMDB00097 | 0,233535 |
| 1,7-Dimethylguanosine                                                                   | 310.115 | HMDB01961 | 0,23321  |
| Sulfinpyrazone sulfide                                                                  | 387.115 | HMDB60943 | 0,232496 |
| 3-(1,1-Dimethylallyl)scopoletin 7-glucoside                                             | 421.148 | HMDB32853 | 0,232088 |
| Citicoline                                                                              | 245.061 | HMDB01413 | 0,231374 |
| 1-Methylguanosine                                                                       | 298.115 | HMDB01563 | 0,231232 |
| LysoPE(0:0/22:6(4Z,7Z,10Z,13Z,16Z,19Z))                                                 | 526.293 | HMDB11496 | 0,230299 |
| 3-Oxo-octadecanoic acid                                                                 | 297.243 | HMDB10736 | 0,229843 |
| 3-Oxohexadecanoic acid                                                                  | 269.212 | HMDB10733 | 0,22926  |
| Cymorcin monoglucoside                                                                  | 329.159 | HMDB29777 | 0,228514 |
| Cascarillin                                                                             | 407.207 | HMDB36836 | 0,228151 |
| Galactitol                                                                              | 181.071 | HMDB00107 | 0,227881 |
| Methyl bisnorbiotinyl ketone                                                            | 215.088 | HMDB04822 | 0,227033 |
| Miglitol                                                                                | 206.103 | HMDB14634 | 0,226827 |
| Sorbitan oleate                                                                         | 429.319 | HMDB29886 | 0,226617 |
| Diplosporin                                                                             | 223.097 | HMDB30680 | 0,226478 |
| 2(N)-Methyl-norsalsolinol                                                               | 180.102 | HMDB01189 | 0,225745 |
| 1H-Indole-3-carboxaldehyde                                                              | 144.044 | HMDB29737 | 0,225592 |
| 3-Furoic acid                                                                           | 111.007 | HMDB00444 | 0,225584 |
| PI(16:0/22:3(10Z,13Z,16Z))                                                              | 445.288 | HMDB09792 | 0,225522 |
| 2,2,4,4,-Tetramethyl-6-(1-oxopropyl)-1,3,5-cyclohexanetrione                            | 237.116 | HMDB33191 | 0,224723 |
| L-beta-aspartyl-L-alanine                                                               | 205.082 | HMDB11162 | 0,224683 |
| Malonylcarnitine                                                                        | 248.113 | HMDB02095 | 0,22428  |
| Cadaverine                                                                              | 103.123 | HMDB02322 | 0,221904 |
| Methyl 2-octynoate                                                                      | 155.107 | HMDB31302 | 0,220412 |
| trans-3,3',4',5,5',7-Hexahydroxyflavanone                                               | 321.06  | HMDB30835 | 0,219917 |
| D-Glucuronic acid                                                                       | 193.035 | HMDB00127 | 0,219592 |
| 9,12,13-TriHOME                                                                         | 329.234 | HMDB04708 | 0,219242 |
| 2,3-diketogulonate                                                                      | 192.024 | HMDB62803 | 0,21648  |
| 2-Octenoic acid                                                                         | 141.091 | HMDB00392 | 0,215812 |
| 1-(1-Propenylthio)propyl propyl disulfide                                               | 223.064 | HMDB33041 | 0,215371 |
| cis-4-Decenedioic acid                                                                  | 199.097 | HMDB00603 | 0,215316 |
| 3-Aminopropionaldehyde                                                                  | 74.0607 | HMDB01106 | 0,214759 |
| 7-Methylguanine                                                                         | 166.073 | HMDB00897 | 0,214208 |
| Docosanamide                                                                            | 340.358 | HMDB00583 | 0,213605 |
| Azelaic acid                                                                            | 187.097 | HMDB00784 | 0,213455 |
| Homocitrulline                                                                          | 190.119 | HMDB00679 | 0,213147 |
| Stearidonyl carnitine                                                                   | 420.31  | HMDB06463 | 0,213042 |
| 3-Hydroxyisoheptanoic acid                                                              | 145.086 | HMDB02207 | 0,212542 |
| N-Acetyl-S-(N-methylcarbamoyl)cysteine                                                  | 219.045 | HMDB41942 | 0,212115 |
| 6-Dimethylaminopurine                                                                   | 162.076 | HMDB00473 | 0,211978 |
| 5'-(3',4'-Dihydroxyphenyl)-gamma-valerolactone sulfate                                  | 289.033 | HMDB29191 | 0,210825 |
| Carboxyphosphamide                                                                      | 291.008 | HMDB60449 | 0,210804 |
| Glycerol tripropanoate                                                                  | 261.131 | HMDB32857 | 0,210443 |
| Acetylphosphate                                                                         | 140.996 | HMDB01494 | 0,210335 |
| Guanidinosuccinic acid                                                                  | 176.066 | HMDB03157 | 0,209922 |
| Ecgonine methyl ester                                                                   | 200.128 | HMDB06406 | 0,20991  |
| 3-Bromosulfolane                                                                        | 198.94  | HMDB40457 | 0,209435 |
| 3,4,5-Trimethoxycinnamic acid                                                           | 239.09  | HMDB02511 | 0,20898  |
| Alpha-ketoisovaleric acid                                                               | 115.039 | HMDB00019 | 0,208811 |
| 2-Methyl-2-cyclopenten-1-one                                                            | 97.0653 | HMDB31545 | 0,208213 |
| alpha-Hydroxymetoprolol                                                                 | 284.186 | HMDB60994 | 0,207985 |
| Suberic acid                                                                            | 173.081 | HMDB00893 | 0,206208 |
| Potassium 2-(1'-ethoxy) ethoxypropanoate                                                | 199.037 | HMDB37192 | 0,205702 |

|                                                                                                                      |         |           |          |
|----------------------------------------------------------------------------------------------------------------------|---------|-----------|----------|
| Allantoin                                                                                                            | 157.036 | HMDB00462 | 0,205391 |
| (R)-N-Methylsalsolinol                                                                                               | 194.118 | HMDB03626 | 0,205235 |
| 2-Amino-3,4-dimethylimidazo[4,5-f]quinoline                                                                          | 213.112 | HMDB29707 | 0,204682 |
| Cortisol                                                                                                             | 363.217 | HMDB00063 | 0,203878 |
| Metenamine                                                                                                           | 141.114 | HMDB29598 | 0,203834 |
| (S)-9-Hydroxy-10-undecenoic acid                                                                                     | 201.148 | HMDB32662 | 0,203571 |
| 1-Cyano-2-hydroxy-3-butene                                                                                           | 98.0606 | HMDB31339 | 0,20316  |
| Sertraline                                                                                                           | 304.071 | HMDB05010 | 0,203085 |
| Osmundalactone                                                                                                       | 129.055 | HMDB31303 | 0,202332 |
| alpha-(1,2-Dihydroxyethyl)-1,2,3,4-tetrahydro-7-hydroxy-9-methoxy-3,4-dioxocyclopenta[c][1]benzopyran-6-acetaldehyde | 347.075 | HMDB62442 | 0,201546 |
| Methyl (7Z,9Z,9'Z)-6'-apo-y-caroten-6'-oate                                                                          | 473.345 | HMDB31381 | 0,201432 |
| Pregnanetriol                                                                                                        | 337.274 | HMDB06070 | 0,201374 |
| Scopolamine                                                                                                          | 302.135 | HMDB03573 | 0,201111 |
| Phosphoglycolic acid                                                                                                 | 156.991 | HMDB00816 | 0,200671 |
| Docosa-4,7,10,13,16-pentaenoyl carnitine                                                                             | 474.358 | HMDB06321 | 0,200487 |
| PC(14:0/18:1(11Z))                                                                                                   | 732.548 | HMDB07872 | 0,199924 |
| Plastoquinone 3                                                                                                      | 341.251 | HMDB33786 | 0,199015 |
| Citranaxanthin                                                                                                       | 457.35  | HMDB36883 | 0,197356 |
| Methoxybrassinin                                                                                                     | 267.059 | HMDB33351 | 0,197003 |
| Ciclopirox                                                                                                           | 208.133 | HMDB15319 | 0,196955 |
| Oleic acid                                                                                                           | 281.249 | HMDB00207 | 0,195361 |
| Dihydro-2,4,6-tris(2-methylpropyl)-4h-1,3,5-dithiazine                                                               | 290.196 | HMDB32221 | 0,194704 |
| Capryloylglycine                                                                                                     | 200.129 | HMDB00832 | 0,19306  |
| Zalcitabine                                                                                                          | 212.103 | HMDB15078 | 0,192929 |
| Chlorphenesin                                                                                                        | 201.034 | HMDB14994 | 0,19243  |
| Tetraphyllin B                                                                                                       | 286.091 | HMDB29914 | 0,189763 |
| 3-Indolebutyric acid                                                                                                 | 204.102 | HMDB02096 | 0,189663 |
| Indoleacetic acid                                                                                                    | 176.071 | HMDB00197 | 0,189621 |
| Flumequine                                                                                                           | 262.084 | HMDB41895 | 0,188507 |
| Prolylhydroxyproline                                                                                                 | 229.118 | HMDB06695 | 0,188281 |
| Acidissiminin                                                                                                        | 660.49  | HMDB38619 | 0,18803  |
| Succinylacetone                                                                                                      | 159.063 | HMDB00635 | 0,187944 |
| 2-Isopropyl-1,4-benzenediol                                                                                          | 153.091 | HMDB32132 | 0,187594 |
| MG(0:0/16:0/0:0)                                                                                                     | 331.284 | HMDB11533 | 0,186804 |
| 2,4-Dimethylthiazole                                                                                                 | 114.038 | HMDB32974 | 0,186354 |
| L-3-Aminodihydro-2(3H)-furanone                                                                                      | 102.055 | HMDB29387 | 0,18623  |
| Vanylglycol                                                                                                          | 185.081 | HMDB01490 | 0,185819 |
| 3-Oxodecanoic acid                                                                                                   | 185.117 | HMDB10724 | 0,185661 |
| Santalyl acetate                                                                                                     | 263.197 | HMDB32501 | 0,185545 |
| Toluene                                                                                                              | 93.0704 | HMDB34168 | 0,183753 |
| Daucic acid                                                                                                          | 203.02  | HMDB31665 | 0,183569 |
| 3-Butyn-1-al                                                                                                         | 69.0342 | HMDB06853 | 0,183442 |
| 3-Amino-2-piperidone                                                                                                 | 115.087 | HMDB00323 | 0,182882 |
| Fluvoxamine                                                                                                          | 319.165 | HMDB14322 | 0,182291 |
| L-Fucose                                                                                                             | 165.076 | HMDB00174 | 0,181782 |
| 3-Oxododecanoic acid                                                                                                 | 213.149 | HMDB10727 | 0,179982 |
| (4-Methylphenyl)acetaldehyde                                                                                         | 135.081 | HMDB29639 | 0,179811 |
| Homocysteine thiolactone                                                                                             | 118.032 | HMDB02287 | 0,179723 |
| Simvastatin                                                                                                          | 419.277 | HMDB05007 | 0,179365 |
| Nor-psi-tropine                                                                                                      | 128.107 | HMDB31667 | 0,178957 |
| Histidinyl-Proline                                                                                                   | 253.127 | HMDB28893 | 0,177674 |
| PE(18:4(6Z,9Z,12Z,15Z)/22:6(4Z,7Z,10Z,13Z,16Z,19Z))                                                                  | 392.748 | HMDB09210 | 0,177591 |
| Linoleic acid                                                                                                        | 281.248 | HMDB00673 | 0,177341 |
| Genipinic acid                                                                                                       | 243.087 | HMDB38126 | 0,177149 |
| Cyclohexanone                                                                                                        | 97.0645 | HMDB03315 | 0,177077 |
| LysoSM(d18:1)                                                                                                        | 466.352 | HMDB06482 | 0,176675 |
| Isoleucyl-Tryptophan                                                                                                 | 318.181 | HMDB28918 | 0,17623  |

|                                                       |         |           |          |
|-------------------------------------------------------|---------|-----------|----------|
| Jasmonic acid                                         | 211.133 | HMDB32797 | 0,176058 |
| Cibulins                                              | 93.0372 | HMDB30299 | 0,175881 |
| Vanilpyruvic acid                                     | 211.058 | HMDB11714 | 0,175763 |
| Erythrityl Tetranitrate                               | 300.991 | HMDB15551 | 0,175639 |
| 3-carboxy-2,3-dihydroxypropanoate                     | 150.014 | HMDB62642 | 0,175458 |
| Delta-Hexanolactone                                   | 115.076 | HMDB00453 | 0,17531  |
| Nabam                                                 | 254.917 | HMDB31224 | 0,175069 |
| 3b,12a-Dihydroxy-5a-cholanoic acid                    | 391.289 | HMDB00348 | 0,174884 |
| LysoPC(20:3(5Z,8Z,11Z))                               | 546.355 | HMDB10393 | 0,174594 |
| Marmesin rhamnoside                                   | 393.152 | HMDB39564 | 0,173562 |
| Nookatone                                             | 219.175 | HMDB13687 | 0,172998 |
| 2-(2-Thienylmethylene)-1,6-dioxaspiro[4.4]non-3-ene   | 219.051 | HMDB34857 | 0,171869 |
| 5-Dodecenoic acid                                     | 199.169 | HMDB00529 | 0,171459 |
| Propofol                                              | 177.127 | HMDB14956 | 0,171242 |
| (R)-3-Hydroxy-5-phenylpentanoic acid                  | 193.086 | HMDB31517 | 0,171234 |
| L-Menthyl acetoacetate                                | 239.165 | HMDB32369 | 0,170495 |
| Octadecylamine                                        | 270.315 | HMDB29586 | 0,169947 |
| Dehydrophytosphingosine                               | 316.285 | HMDB38057 | 0,169417 |
| (3R,7R)-1,3,7-Octanetriol                             | 163.133 | HMDB33625 | 0,169251 |
| Varenicline                                           | 212.118 | HMDB15398 | 0,168032 |
| (Z)-1,3-Octadiene                                     | 109.102 | HMDB61897 | 0,167738 |
| Mesuagin                                              | 389.137 | HMDB35876 | 0,167574 |
| Arecoline                                             | 156.102 | HMDB30353 | 0,167573 |
| Ribitol                                               | 151.06  | HMDB00508 | 0,167428 |
| lysoPC(6:0)                                           | 356.185 | HMDB29207 | 0,166807 |
| Pyruvaldehyde                                         | 71.0124 | HMDB01167 | 0,166434 |
| 5-Hydroxy-L-tryptophan                                | 221.092 | HMDB00472 | 0,166423 |
| 1-Methylinosine                                       | 283.104 | HMDB02721 | 0,165728 |
| Niazirin                                              | 280.122 | HMDB32807 | 0,165696 |
| Guanosine                                             | 284.099 | HMDB00133 | 0,164486 |
| Alclometasone                                         | 409.175 | HMDB14385 | 0,164172 |
| (S,E)-Zearalenone                                     | 319.153 | HMDB31752 | 0,162668 |
| 3-Methylcyclopentadecanone                            | 239.237 | HMDB34181 | 0,162249 |
| 2-Hydroxyfluorene                                     | 92.0433 | HMDB13163 | 0,16084  |
| 4-Methylcatechol                                      | 125.06  | HMDB00873 | 0,160452 |
| N-Carboxyethyl-g-aminobutyric acid                    | 174.076 | HMDB02201 | 0,159822 |
| Cortolone-3-glucuronide                               | 541.266 | HMDB10320 | 0,159756 |
| Quinolinic acid                                       | 166.017 | HMDB00232 | 0,159728 |
| 4-Ketocyclophosphamide                                | 275.008 | HMDB60686 | 0,159391 |
| L-phenylalanyl-L-proline                              | 263.139 | HMDB11177 | 0,158454 |
| Alosetron                                             | 295.152 | HMDB15104 | 0,158075 |
| Methylarsonate                                        | 140.951 | HMDB12258 | 0,157761 |
| Mizoribine                                            | 258.075 | HMDB41934 | 0,15774  |
| Guaifenesin                                           | 197.081 | HMDB04998 | 0,157291 |
| Tetrahydrofuran                                       | 73.0655 | HMDB00246 | 0,156877 |
| Pipericyclobutanamide B                               | 595.289 | HMDB36361 | 0,156858 |
| LysoPE(0:0/20:5(5Z,8Z,11Z,14Z,17Z))                   | 498.263 | HMDB11489 | 0,156857 |
| Glucosamine                                           | 180.087 | HMDB01514 | 0,155956 |
| Citronellyl anthranilate                              | 276.199 | HMDB32208 | 0,155703 |
| D-glycero-L-galacto-Octulose                          | 239.077 | HMDB29954 | 0,155432 |
| 5-Methoxytryptophol                                   | 192.102 | HMDB01896 | 0,155366 |
| 2,6 Dimethylheptanoyl carnitine                       | 302.233 | HMDB06320 | 0,154887 |
| Glycerol                                              | 93.0552 | HMDB00131 | 0,154758 |
| Diethylthiophosphate                                  | 171.026 | HMDB01460 | 0,153305 |
| 3-hydroxynonanoyl carnitine                           | 318.228 | HMDB61635 | 0,152824 |
| 4-Hydroxybenzoic acid                                 | 137.023 | HMDB00500 | 0,15197  |
| Homogentisic acid                                     | 169.047 | HMDB00130 | 0,151555 |
| Bissulfine                                            | 179.022 | HMDB30000 | 0,151553 |
| 2,2,7,7-Tetramethyl-1,6-dioxaspiro[4.4]nona-3,8-diene | 181.122 | HMDB30007 | 0,151378 |

|                                                                                           |         |           |          |
|-------------------------------------------------------------------------------------------|---------|-----------|----------|
| 3-Methylcyclopentene                                                                      | 83.0861 | HMDB31544 | 0,151348 |
| 3,4-Dihydroxybenzylamine                                                                  | 138.055 | HMDB12153 | 0,151127 |
| 5-Hydroxytryptophol                                                                       | 178.086 | HMDB01855 | 0,150989 |
| 2-Bromophenol                                                                             | 170.943 | HMDB32059 | 0,150333 |
| 2-Furanmethanol                                                                           | 99.0445 | HMDB13742 | 0,150251 |
| 3,4-Dihydroxyphenylglycol                                                                 | 169.05  | HMDB00318 | 0,150158 |
| Arbutamine                                                                                | 318.166 | HMDB15234 | 0,150005 |
| Meperidine                                                                                | 248.168 | HMDB14597 | 0,149162 |
| 5-O-Feruloylnigrumin                                                                      | 226.583 | HMDB38735 | 0,148292 |
| Selenomethionine                                                                          | 198.001 | HMDB03966 | 0,148238 |
| 2-trans,4-cis-Decadienoylcarnitine                                                        | 312.217 | HMDB13325 | 0,14799  |
| N4-Acetylcytidine                                                                         | 286.103 | HMDB05923 | 0,14793  |
| N-Methylcalystegine C1                                                                    | 206.102 | HMDB36394 | 0,14686  |
| 1,3-Diacetylpropane                                                                       | 127.075 | HMDB29165 | 0,146285 |
| Silicic acid                                                                              | 94.9794 | HMDB31436 | 0,146095 |
| 4-Heptenal diethyl acetal                                                                 | 201.076 | HMDB32306 | 0,145984 |
| Foeniculoside VIII                                                                        | 349.183 | HMDB33009 | 0,145359 |
| Glycolic acid                                                                             | 75.0073 | HMDB00115 | 0,144319 |
| L-beta-aspartyl-L-threonine                                                               | 233.078 | HMDB11169 | 0,143914 |
| Undecanedioic acid                                                                        | 215.128 | HMDB00888 | 0,143765 |
| Butyric acid                                                                              | 87.0438 | HMDB00039 | 0,143758 |
| (S)-5-Diphosphomevalonic acid                                                             | 306.999 | HMDB01090 | 0,143197 |
| (9Z,11E,13E,15Z)-4-Oxo-9,11,13,15-octadecatetraenoic acid                                 | 291.194 | HMDB31098 | 0,143178 |
| Dodecanedioic acid                                                                        | 229.144 | HMDB00623 | 0,143031 |
| O-Phosphoethanolamine                                                                     | 142.026 | HMDB00224 | 0,142718 |
| Imiquimod                                                                                 | 241.144 | HMDB14862 | 0,142122 |
| Methylmalonylcarnitine                                                                    | 262.129 | HMDB13133 | 0,142016 |
| Cervonyl carnitine                                                                        | 472.342 | HMDB06510 | 0,141059 |
| Azosemide                                                                                 | 368.999 | HMDB41831 | 0,140887 |
| Methyl sorbate                                                                            | 127.076 | HMDB29582 | 0,140853 |
| Polyethylene, oxidized                                                                    | 243.124 | HMDB32472 | 0,140559 |
| Hydroxylated lecithin                                                                     | 147.042 | HMDB32332 | 0,140258 |
| 5-Methyl-2-thiophenecarboxaldehyde                                                        | 125.006 | HMDB32431 | 0,140015 |
| 2-Oxo-3-hydroxy-4-phosphobutanoic acid                                                    | 212.979 | HMDB06801 | 0,139443 |
| alpha-hydroxysalmeterol                                                                   | 432.28  | HMDB61045 | 0,138889 |
| Propenoylcarnitine                                                                        | 216.123 | HMDB13124 | 0,138344 |
| l(-)                                                                                      | 126.904 | HMDB59634 | 0,138317 |
| Riboflavin                                                                                | 377.144 | HMDB00244 | 0,138213 |
| 6-Dehydrotestosterone glucuronide                                                         | 463.232 | HMDB10337 | 0,137973 |
| Tocainide                                                                                 | 193.132 | HMDB15189 | 0,13731  |
| 2,3,6-Trimethylphenol                                                                     | 137.098 | HMDB29667 | 0,136851 |
| S-2-Propenyl 1-propenesulfinothioate                                                      | 163.026 | HMDB32750 | 0,135255 |
| (S)-Spirobrassinin                                                                        | 251.034 | HMDB35974 | 0,135138 |
| Oxprenolol                                                                                | 266.173 | HMDB15520 | 0,135128 |
| p-Cresol                                                                                  | 109.065 | HMDB01858 | 0,135118 |
| Porphobilinogen                                                                           | 227.103 | HMDB00245 | 0,135038 |
| 11-Hydroxy-12-methoxydihydrokawain                                                        | 279.12  | HMDB30766 | 0,134992 |
| 7-Ketodeoxycholic acid                                                                    | 405.268 | HMDB00391 | 0,134506 |
| (S)-3-Hydroxynonanoic acid                                                                | 173.117 | HMDB31513 | 0,134425 |
| Cassiachromone                                                                            | 233.079 | HMDB30813 | 0,13426  |
| LysoPC(18:2(9Z,12Z))                                                                      | 520.333 | HMDB10386 | 0,133747 |
| 2,4-Dihydroxy-6,7-dimethoxy-2H-1,4-benzoxazin-3(4H)-one                                   | 240.049 | HMDB37548 | 0,132866 |
| (-)-trans-Carveol glucoside                                                               | 313.164 | HMDB29848 | 0,132694 |
| 1,1'-(Tetrahydro-6a-hydroxy-2,3a,5-trimethylfuro[2,3-d]-1,3-dioxole-2,5-diyl)bis-ethanone | 257.103 | HMDB32527 | 0,132654 |
| trans-trans-Muconic acid                                                                  | 141.018 | HMDB02349 | 0,132647 |
| Tetradecanedioic acid                                                                     | 257.176 | HMDB00872 | 0,132498 |
| 8-O-Methylolongine                                                                        | 327.18  | HMDB34579 | 0,132354 |
| Fenthion                                                                                  | 279.029 | HMDB33209 | 0,132124 |



|                                                                |         |           |          |
|----------------------------------------------------------------|---------|-----------|----------|
| 4-Aminophenol                                                  | 110.06  | HMDB01169 | 0,132065 |
| 1-Methyl-1,3-cyclohexadiene                                    | 95.0861 | HMDB31532 | 0,131971 |
| 3-hydroxyundecanoyl carnitine                                  | 346.259 | HMDB61637 | 0,131762 |
| Alpha-Linolenic acid                                           | 279.232 | HMDB01388 | 0,130933 |
| Vitamin K1 2,3-epoxide                                         | 467.358 | HMDB02972 | 0,130763 |
| (2xi,6xi)-7-Methyl-3-methylene-1,2,6,7-octanetetrol            | 203.128 | HMDB33217 | 0,130526 |
| Avenic acid A                                                  | 323.147 | HMDB30416 | 0,130201 |
| Melibiose                                                      | 341.109 | HMDB00048 | 0,130116 |
| 2-Propene-1-thiol                                              | 75.0267 | HMDB31635 | 0,130014 |
| Dityrosine                                                     | 359.125 | HMDB06045 | 0,129805 |
| Chondrillasterol 3-[glucosyl-(1->2)-glucosyl-(1->2)-glucoside] | 450.274 | HMDB33887 | 0,129442 |
| Cordeauxione                                                   | 293.063 | HMDB34310 | 0,129189 |
| Glutaminy-Glutamate                                            | 275.11  | HMDB28796 | 0,128527 |
| Sertindole                                                     | 441.189 | HMDB15618 | 0,127675 |
| (E)-2-octenal                                                  | 127.112 | HMDB13809 | 0,127577 |
| Ethyl glucuronide                                              | 223.085 | HMDB10325 | 0,127427 |
| Menadiol dibutyrate                                            | 315.157 | HMDB32726 | 0,127052 |
| Glycyl-Tryptophan                                              | 262.119 | HMDB28852 | 0,126906 |
| Flurandrenolide                                                | 437.236 | HMDB14984 | 0,126137 |
| Desflurane                                                     | 166.992 | HMDB15320 | 0,125997 |
| Propyl propane thiosulfonate                                   | 227.091 | HMDB32496 | 0,125682 |
| Hydrocortamate                                                 | 476.307 | HMDB14907 | 0,125264 |
| (10S,11S)-Pterosin C                                           | 235.132 | HMDB30763 | 0,125155 |
| 3-Hydroxysebacic acid                                          | 217.108 | HMDB00350 | 0,124702 |
| 2,6-Dimethoxy-4-propylphenol                                   | 195.102 | HMDB36226 | 0,124646 |
| PI(16:0/20:2(11Z,14Z))                                         | 863.557 | HMDB09786 | 0,124614 |
| Benzene                                                        | 79.0547 | HMDB01505 | 0,123817 |
| Pregnenolone sulfate                                           | 397.2   | HMDB00774 | 0,123761 |
| Metyrosine                                                     | 194.081 | HMDB14903 | 0,121544 |
| Betamethasone                                                  | 393.21  | HMDB14586 | 0,121014 |
| Coriandrone D                                                  | 353.158 | HMDB29972 | 0,120967 |
| Pteroside B                                                    | 381.188 | HMDB30760 | 0,120581 |
| 2-(3-carboxy-3-(trimethylammonio)propyl)-L-histidine           | 300.181 | HMDB59617 | 0,120055 |
| Melphalan                                                      | 305.086 | HMDB15176 | 0,119978 |
| 2,3-Dihydroxyvaleric acid                                      | 133.049 | HMDB00421 | 0,119737 |
| Clenbuterol                                                    | 275.076 | HMDB15477 | 0,119713 |
| 8-Acetylegelolide                                              | 309.131 | HMDB37772 | 0,119021 |
| Indole-3-carbinol                                              | 148.076 | HMDB05785 | 0,118909 |
| Berberine                                                      | 337.126 | HMDB03409 | 0,118683 |
| Cysteinyl-Cysteine                                             | 225.035 | HMDB28772 | 0,118673 |
| Citronellyl beta-sophoroside                                   | 481.262 | HMDB32839 | 0,118648 |
| Asparaginy-Hydroxyproline                                      | 246.108 | HMDB28732 | 0,11857  |
| (R)-3-Hydroxy-Octadecanoic acid                                | 299.259 | HMDB10737 | 0,118406 |
| Gentisic acid                                                  | 153.018 | HMDB00152 | 0,118262 |
| 6,11-Dihydroxy-2,2-dimethylpyrano[3,2-c]xanthen-7(2H)-one      | 311.089 | HMDB40357 | 0,118099 |
| 2-Aminoacrylic acid                                            | 88.0399 | HMDB03609 | 0,116965 |
| Tungsten                                                       | 184.96  | HMDB01989 | 0,116644 |
| Gabapentin                                                     | 172.133 | HMDB05015 | 0,116553 |
| Fluorouracil                                                   | 131.024 | HMDB14684 | 0,116546 |
| S-Carboxymethyl-L-cysteine                                     | 178.017 | HMDB29415 | 0,116308 |
| N-Desmethylpromazine                                           | 269.113 | HMDB13939 | 0,116227 |
| Eplerenone                                                     | 413.2   | HMDB14838 | 0,116164 |
| (E)-2-Butenal                                                  | 71.0498 | HMDB34233 | 0,116132 |
| 3'-Hydroxy-HT2 toxin                                           | 441.21  | HMDB36162 | 0,115243 |
| Dimethyl sulfone                                               | 95.0166 | HMDB04983 | 0,114925 |
| 3-Indolepropionic acid                                         | 190.086 | HMDB02302 | 0,114497 |
| Acetylglycine                                                  | 116.034 | HMDB00532 | 0,114155 |

|                                                                                |         |           |           |
|--------------------------------------------------------------------------------|---------|-----------|-----------|
| 5-Hexyltetrahydro-2-oxo-3-furancarboxylic acid                                 | 215.126 | HMDB30984 | 0,114121  |
| 3-Hydroxy-4-aminopyridine sulfate                                              | 188.997 | HMDB61120 | 0,113939  |
| 1-(beta-D-Ribofuranosyl)-1,4-dihyronicotinamide                                | 257.113 | HMDB11648 | 0,113779  |
| Corchorifatty acid F                                                           | 329.231 | HMDB35919 | 0,113331  |
| (R)-2-Benzylsuccinate                                                          | 209.078 | HMDB12127 | 0,112923  |
| 2-Hydroxypyridine                                                              | 96.0449 | HMDB13751 | 0,112871  |
| Gluconolactone                                                                 | 177.04  | HMDB00150 | 0,111834  |
| Ethambutol                                                                     | 205.193 | HMDB14474 | 0,111246  |
| Lorazepam                                                                      | 319.002 | HMDB14332 | 0,11057   |
| N-Undecanoylglycine                                                            | 244.191 | HMDB13286 | 0,110256  |
| 5-(2-Methylpropyl)tetrahydro-2-oxo-3-furancarboxylic acid                      | 185.081 | HMDB30988 | 0,109882  |
| 1-(alpha-Methyl-4-(2-methylpropyl)benzeneacetate)-beta-D-Glucopyranuronic acid | 383.168 | HMDB10343 | 0,109545  |
| D-Glyceraldehyde 3-phosphate                                                   | 171.006 | HMDB01112 | 0,109378  |
| Hydroxyphenylacetyl glycine                                                    | 208.06  | HMDB00735 | 0,108777  |
| 4-Hydroxypropofol                                                              | 195.138 | HMDB14018 | 0,108555  |
| 7(14)-Bisabolene-2,3,10,11-tetrol                                              | 271.192 | HMDB35918 | 0,108163  |
| Methionyl-Methionine                                                           | 281.1   | HMDB28979 | 0,107804  |
| L-beta-aspartyl-L-glutamic acid                                                | 263.087 | HMDB11164 | 0,107235  |
| Forasartan                                                                     | 209.128 | HMDB15434 | 0,107212  |
| Dolichosterone                                                                 | 463.342 | HMDB34336 | 0,107122  |
| Hydralazine pyruvate hydrazone                                                 | 231.084 | HMDB61143 | 0,107094  |
| Benzamide                                                                      | 122.06  | HMDB04461 | 0,106965  |
| Methylimidazole acetaldehyde                                                   | 125.071 | HMDB04181 | 0,106745  |
| Santene                                                                        | 123.117 | HMDB38140 | 0,106193  |
| 3-Chloro-1-(4-hydroxy-3-methoxyphenyl)-1,2-propanediol                         | 233.059 | HMDB34633 | 0,105833  |
| Schidigeragenin B                                                              | 429.302 | HMDB35506 | 0,105654  |
| N-(1-Deoxy-1-fructosyl)phenylalanine                                           | 326.125 | HMDB37846 | 0,104784  |
| Fructose 6-phosphate                                                           | 259.022 | HMDB00124 | 0,104755  |
| 1,2-Benzisothiazol-3(2H)-one                                                   | 152.017 | HMDB34413 | 0,104086  |
| 2,3,6,7-Tetrahydro-7-methylcyclopent[b]azepin-8(1H)-one                        | 164.107 | HMDB39661 | 0,104064  |
| Gibberellin A55                                                                | 365.157 | HMDB33420 | 0,103741  |
| 2-Keto-glutaramic acid                                                         | 144.029 | HMDB01552 | 0,103707  |
| Pyridoxal                                                                      | 168.066 | HMDB01545 | 0,103419  |
| Chlorhexidine                                                                  | 253.109 | HMDB15016 | 0,102984  |
| 2-Phenylethyl beta-D-glucopyranoside                                           | 283.119 | HMDB29819 | 0,102591  |
| 1-Stearoylglycerophosphoserine                                                 | 522.284 | HMDB61698 | 0,10256   |
| Polypropylene glycol (m w 1,200-3,000)                                         | 135.102 | HMDB32478 | 0,102247  |
| Glutamyl-Lysine                                                                | 275.147 | HMDB28824 | 0,102026  |
| Cycloserine                                                                    | 103.051 | HMDB14405 | 0,101399  |
| 1-(2,4,6-Trimethoxyphenyl)-1,3-butanedione                                     | 251.092 | HMDB30668 | 0,101363  |
| Cerulein                                                                       | 224.13  | HMDB15168 | 0,101103  |
| Debrisoquine                                                                   | 176.117 | HMDB06543 | 0,100561  |
| Sebacic acid                                                                   | 201.113 | HMDB00792 | 0,10046   |
| beta-D-Glucopyranosyl-11-hydroxyjasmonic acid                                  | 387.166 | HMDB39964 | 0,100325  |
| Hexadecanedioic acid                                                           | 285.207 | HMDB00672 | 0,0993983 |
| 1,11-Undecanedicarboxylic acid                                                 | 243.16  | HMDB02327 | 0,099126  |
| Triamcinolone                                                                  | 393.172 | HMDB14758 | 0,0983637 |
| (3beta,22E)-26,27-Dinorergosta-5,22-dien-3-ol                                  | 371.327 | HMDB29863 | 0,0981042 |
| 5-Phenylvaleric acid                                                           | 179.107 | HMDB02043 | 0,0974069 |
| 4,4'-Thiobis-2-butanone                                                        | 175.079 | HMDB37155 | 0,0967678 |
| 9-Hydroxycalabaxanthone                                                        | 409.162 | HMDB31920 | 0,0959451 |
| 5-Ethyl-3-hydroxy-4-methyl-2(5H)-furanone                                      | 143.07  | HMDB33551 | 0,0958729 |
| Bethanidine                                                                    | 178.134 | HMDB14362 | 0,0957617 |
| 1-Methoxy-1-(2,4,5-trimethoxyphenyl)-2-propanol                                | 255.122 | HMDB31772 | 0,0956969 |
| 12(13)Ep-9-KODE                                                                | 309.207 | HMDB13623 | 0,0954374 |
| Isovalerylglutamic acid                                                        | 232.118 | HMDB00726 | 0,0954082 |
| Corchoionoside B                                                               | 399.165 | HMDB30975 | 0,0953589 |
| Galactosylhydroxylysine                                                        | 325.162 | HMDB00600 | 0,0949313 |

|                                                                     |         |           |           |
|---------------------------------------------------------------------|---------|-----------|-----------|
| Sunitinib                                                           | 397.205 | HMDB15397 | 0,0949266 |
| epsilon-Viniferin                                                   | 228.08  | HMDB30604 | 0,0949212 |
| trans-4,5-epoxy-2(E)-decenal                                        | 169.122 | HMDB13105 | 0,0948911 |
| (R)-Pelletierine                                                    | 142.123 | HMDB30324 | 0,0948115 |
| Otobanone                                                           | 339.12  | HMDB30618 | 0,0947246 |
| Nevirapine                                                          | 267.121 | HMDB14383 | 0,0943626 |
| Porson                                                              | 387.18  | HMDB30810 | 0,0938045 |
| N-Nonanoylglycine                                                   | 214.144 | HMDB13279 | 0,0937379 |
| Carbendazim                                                         | 192.075 | HMDB31769 | 0,0937373 |
| Parabanic Acid                                                      | 112.998 | HMDB62802 | 0,0934994 |
| Decitabine                                                          | 227.077 | HMDB15391 | 0,0932818 |
| Salicyluric acid                                                    | 194.045 | HMDB00840 | 0,0928555 |
| Guanine                                                             | 152.057 | HMDB00132 | 0,0922906 |
| Methylphosphate                                                     | 110.984 | HMDB61711 | 0,0915161 |
| 1-Propenyl 1-(1-propenylthio)propyl disulfide                       | 219.033 | HMDB38967 | 0,0913672 |
| Dihydro-2-methoxy-2-methyl-3(2H)-thiophenone                        | 147.047 | HMDB40237 | 0,0911947 |
| Polyporusterone B                                                   | 477.319 | HMDB38496 | 0,0893446 |
| S-2-Propenyl 1-propanesulfinothioate                                | 163.024 | HMDB32741 | 0,0888471 |
| Neuroprotectin D1                                                   | 361.235 | HMDB03689 | 0,0883374 |
| 4-Hydroxy-2-oxoglutaric acid                                        | 161.008 | HMDB02070 | 0,0882962 |
| 16-Oxoestrone                                                       | 283.137 | HMDB00372 | 0,0881417 |
| Norcotinine                                                         | 163.086 | HMDB01297 | 0,0881024 |
| Distichonic acid A                                                  | 295.115 | HMDB38752 | 0,0880972 |
| Penmacric acid                                                      | 201.052 | HMDB29436 | 0,08809   |
| Hydroxytyrosol                                                      | 155.07  | HMDB05784 | 0,088026  |
| Phthalide                                                           | 135.044 | HMDB32469 | 0,0879617 |
| Boviquinone 4                                                       | 413.266 | HMDB30057 | 0,0874027 |
| Desglucocoroloside                                                  | 505.314 | HMDB33709 | 0,0864361 |
| 2,3-Dehydrosalvipisone                                              | 309.153 | HMDB40742 | 0,0864201 |
| N-Succinyl-L,L-2,6-diaminopimelate                                  | 291.12  | HMDB12267 | 0,0861827 |
| 1b-Hydroxycholic acid                                               | 425.289 | HMDB00307 | 0,0856382 |
| p-Hydroxyphenylacetic acid                                          | 151.039 | HMDB00020 | 0,0852118 |
| trans-Ferulic acid                                                  | 193.05  | HMDB00954 | 0,0849677 |
| Chloral hydrate                                                     | 162.911 | HMDB60451 | 0,0847882 |
| 2,3-Dinor-6-keto-prostaglandin F1 a                                 | 341.196 | HMDB02277 | 0,0845584 |
| 5-[(4-Hydroxyphenyl)ethenyl]-2-(3-methyl-1-butenyl)-1,3-benzenediol | 295.137 | HMDB30599 | 0,0844419 |
| 3-Methyluric acid                                                   | 181.038 | HMDB01970 | 0,0838787 |
| Chloroxine                                                          | 213.983 | HMDB15373 | 0,0835698 |
| 2-Chloro-5-methylmaleylacetate                                      | 207.008 | HMDB60346 | 0,0834839 |
| Lipoyllysine                                                        | 335.147 | HMDB12996 | 0,0832959 |
| N-Desalkyl flurazepam                                               | 289.05  | HMDB61161 | 0,0831391 |
| p-Anisidine                                                         | 124.076 | HMDB29300 | 0,0829851 |
| Hydrocinnamic acid                                                  | 151.075 | HMDB00764 | 0,0829497 |
| Gentian Violet                                                      | 373.256 | HMDB14550 | 0,0826514 |
| 1-Pyrroline-5-carboxylic acid                                       | 114.055 | HMDB01301 | 0,0825673 |
| 3-Hydroxydodecanedioic acid                                         | 245.139 | HMDB00413 | 0,0824737 |
| Leukotriene A4                                                      | 319.225 | HMDB01337 | 0,0813787 |
| Arbutin                                                             | 273.097 | HMDB29943 | 0,081259  |
| Methyl 2-(10-heptadecenyl)-6-hydroxybenzoate                        | 387.286 | HMDB38523 | 0,081212  |
| MG(0:0/16:1(9Z)/0:0)                                                | 327.254 | HMDB11534 | 0,0811735 |
| Gemfibrozil                                                         | 251.161 | HMDB15371 | 0,0808314 |
| 13'-Carboxy-gamma-tocopherol                                        | 447.346 | HMDB12557 | 0,0807315 |
| 13-Hydroxy-9-methoxy-10-oxo-11-octadecenoic acid                    | 343.248 | HMDB40901 | 0,0804823 |
| 4-Nitrophenol                                                       | 138.018 | HMDB01232 | 0,0804275 |
| 2,2,4,4-Tetramethyl-6-(1-oxobutyl)-1,3,5-cyclohexanetrione          | 251.132 | HMDB33197 | 0,07979   |
| (-)-trans-Carveol                                                   | 153.128 | HMDB03450 | 0,0796106 |
| Dodecamethylpentasiloxane                                           | 383.135 | HMDB62731 | 0,0795961 |

|                                                          |         |           |           |
|----------------------------------------------------------|---------|-----------|-----------|
| 4-Hydroxy-3-prenylbenzoic acid glucoside                 | 367.139 | HMDB39891 | 0,0795733 |
| Isopentenyladenine-9-N-glucoside                         | 364.197 | HMDB12240 | 0,0791677 |
| O-methoxycatechol-O-sulphate                             | 205.017 | HMDB60013 | 0,079141  |
| Phaseolic acid                                           | 261.134 | HMDB31897 | 0,0785469 |
| (R)-Dihydromaleimide                                     | 98.0233 | HMDB30276 | 0,0778666 |
| 3-Methylcrotonylglycine                                  | 158.081 | HMDB00459 | 0,0776371 |
| alpha-Fluoro-beta-alanine                                | 108.045 | HMDB60434 | 0,0776099 |
| Traumatic acid                                           | 229.141 | HMDB00933 | 0,0758664 |
| 6-Gingesulfonic acid                                     | 359.156 | HMDB38999 | 0,0758278 |
| Allolithocholic acid                                     | 375.294 | HMDB00381 | 0,0758195 |
| Indoleacetaldehyde                                       | 160.076 | HMDB01190 | 0,0751403 |
| Neryl glucoside                                          | 315.181 | HMDB29346 | 0,0743013 |
| Aspartyl-Glutamine                                       | 262.103 | HMDB28751 | 0,0738087 |
| Sumatriptan                                              | 296.146 | HMDB05037 | 0,073654  |
| Oxalic acid                                              | 88.9866 | HMDB02329 | 0,0731684 |
| Glaucarubin                                              | 497.236 | HMDB35626 | 0,0730867 |
| threo-Syringoylglycerol                                  | 243.086 | HMDB31237 | 0,0730468 |
| Chloropentafluoroethane                                  | 154.967 | HMDB31333 | 0,0721315 |
| Oxymorphone                                              | 302.135 | HMDB15323 | 0,0721031 |
| Methyl 3-(2,3-dihydroxy-3-methylbutyl)-4-hydroxybenzoate | 253.108 | HMDB32796 | 0,0717016 |
| 3,4,5-Trimethoxyphenyl acetate                           | 225.075 | HMDB31722 | 0,0715307 |
| Nicotinic acid                                           | 124.04  | HMDB01488 | 0,0712056 |
| Atenolol                                                 | 267.172 | HMDB01924 | 0,0711442 |
| N-Methylphenylethanolamine                               | 152.107 | HMDB01387 | 0,0708852 |
| 4-Hydroxyphenylpyruvic acid                              | 179.034 | HMDB00707 | 0,0704858 |
| Fucose 1-phosphate                                       | 243.027 | HMDB01265 | 0,0704778 |
| Lomustine                                                | 234.097 | HMDB15337 | 0,0704106 |
| Valproic acid glucuronide                                | 319.14  | HMDB00901 | 0,0703511 |
| 7-Acetoxy-2-methylisoflavone                             | 295.094 | HMDB29364 | 0,0703281 |
| Phenyl vinyl sulfide                                     | 137.041 | HMDB31825 | 0,070179  |
| Tetrahydrofurfuryl butyrate                              | 171.102 | HMDB36188 | 0,0693923 |
| Cuminaldehyde                                            | 149.096 | HMDB02214 | 0,0687087 |
| 5-Nonyltetrahydro-2-oxo-3-furancarboxylic acid           | 255.16  | HMDB30993 | 0,0686841 |
| 11-nitro-1-undecene                                      | 200.165 | HMDB62669 | 0,0682814 |
| 2-Dodecylbenzenesulfonic acid                            | 327.201 | HMDB31031 | 0,0681098 |
| 15-Deacetylneosalinol                                    | 341.157 | HMDB36157 | 0,0676934 |
| p-Cymene                                                 | 135.117 | HMDB05805 | 0,0675947 |
| Anileridine                                              | 353.222 | HMDB15049 | 0,0673208 |
| Caproic acid                                             | 117.091 | HMDB00535 | 0,0665534 |
| 2-(4-Methyl-5-thiazolyl)ethyl octanoate                  | 270.155 | HMDB32423 | 0,0659651 |
| Cucurbitic acid                                          | 211.133 | HMDB29388 | 0,0659273 |
| Levocabastine                                            | 421.234 | HMDB15238 | 0,0654754 |
| Prostaglandin E2                                         | 353.231 | HMDB01220 | 0,0652796 |
| Dimethylethanolamine                                     | 90.0919 | HMDB32231 | 0,065246  |
| 3-Methyl-4-phenyl-3-buten-2-one                          | 161.096 | HMDB31567 | 0,0650726 |
| Trifluridine                                             | 297.074 | HMDB14576 | 0,0643098 |
| Norepinephrine                                           | 170.081 | HMDB00216 | 0,0637832 |
| 2-Phenylbutyric acid                                     | 165.091 | HMDB00329 | 0,0637657 |
| Hexaethylene glycol                                      | 283.175 | HMDB61822 | 0,0635475 |
| N-Decanoylglycine                                        | 228.16  | HMDB13267 | 0,0633085 |
| D-Limonene                                               | 137.133 | HMDB03375 | 0,0620937 |
| N-Deschlorobenzoyl indomethacin                          | 220.097 | HMDB13988 | 0,06194   |
| 3-Propylidene-1(3H)-isobenzofuranone                     | 175.075 | HMDB31845 | 0,0616228 |
| Malonic acid                                             | 103.002 | HMDB00691 | 0,0606631 |
| 3,6-Dihydro-4-(4-methyl-3-pentenyl)-1,2-dithiin          | 199.061 | HMDB30009 | 0,0606573 |
| Corchoionol C 9-glucoside                                | 385.186 | HMDB29772 | 0,0602567 |
| Clozapine                                                | 327.142 | HMDB14507 | 0,0597853 |
| Dimethicone                                              | 161.081 | HMDB33532 | 0,0597408 |

|                                                                |         |           |           |
|----------------------------------------------------------------|---------|-----------|-----------|
| Jasmolone glucoside                                            | 343.174 | HMDB32870 | 0,0593304 |
| cis-Methylbixin                                                | 409.236 | HMDB32021 | 0,058687  |
| PE(P-16:0e/0:0)                                                | 436.283 | HMDB11152 | 0,0576932 |
| L-Cysteine                                                     | 122.027 | HMDB00574 | 0,0568922 |
| Spirolactone                                                   | 415.197 | HMDB14565 | 0,0563162 |
| 4-Hydroxycyclohexylcarboxylic acid                             | 143.07  | HMDB01988 | 0,0555263 |
| Armillane                                                      | 421.22  | HMDB35779 | 0,0549709 |
| Octanal                                                        | 129.128 | HMDB01140 | 0,0549198 |
| Senecioic acid                                                 | 101.06  | HMDB00509 | 0,0548396 |
| Morellin                                                       | 273.134 | HMDB30794 | 0,054526  |
| Oxoadipic acid                                                 | 159.029 | HMDB00225 | 0,0543651 |
| Paxilline                                                      | 436.254 | HMDB30323 | 0,0538385 |
| trans-3-Hydroxycotinine glucuronide                            | 369.131 | HMDB01204 | 0,0526173 |
| beta-Damascenone                                               | 191.143 | HMDB13804 | 0,0525836 |
| 2-Isopropylmalic acid                                          | 175.06  | HMDB00402 | 0,0517888 |
| Caprylic acid                                                  | 143.107 | HMDB00482 | 0,0515803 |
| Dicyclohexyl disulfide                                         | 231.121 | HMDB41448 | 0,0515567 |
| 3-Hydroxy-9-(4-hydroxyphenyl)-1H,3H-naphtho[1,8-cd]pyran-1-one | 293.078 | HMDB39404 | 0,0514536 |
| 3-Methyl-1-butylamine                                          | 88.1126 | HMDB31659 | 0,0514471 |
| 4-Fumarylacetoacetic acid                                      | 199.022 | HMDB01268 | 0,051298  |
| Mevalonic acid                                                 | 147.065 | HMDB00227 | 0,0499493 |
| Latanoprost                                                    | 433.293 | HMDB14792 | 0,0498631 |
| 1,4-Ipomeadiol                                                 | 169.086 | HMDB30471 | 0,0490004 |
| Rishitin                                                       | 223.169 | HMDB35593 | 0,0479272 |
| Histidylproline diketopiperazine                               | 247.118 | HMDB02053 | 0,0478659 |
| Octadecanedioic acid                                           | 313.239 | HMDB00782 | 0,0470027 |
| 3,4-DHPEA-EA                                                   | 379.137 | HMDB29304 | 0,0468817 |
| Crotamiton                                                     | 204.138 | HMDB14410 | 0,0467148 |
| p-Toluenesulfonic acid                                         | 171.01  | HMDB59933 | 0,0452802 |
| 2,3-Dimethyl-2-cyclohexen-1-one                                | 125.096 | HMDB31414 | 0,0452144 |
| Methylgingerol                                                 | 309.206 | HMDB29852 | 0,0441857 |
| Tridecanoylglycine                                             | 272.222 | HMDB13317 | 0,0435835 |
| 6-Acetyl-1,2,3,4-tetrahydropyridine                            | 126.092 | HMDB30345 | 0,0431619 |
| N-Acetyl-2,3-dihydro-1H-pyrrole                                | 112.076 | HMDB31163 | 0,0425068 |
| Lucidenic acid A                                               | 459.28  | HMDB37611 | 0,0424766 |
| 12-Oxo-20-carboxy-leukotriene B4                               | 365.193 | HMDB12550 | 0,0419289 |
| 3-Hydroxyanthranilic acid                                      | 152.034 | HMDB01476 | 0,0417897 |
| (Z)-5-[(5-Methyl-2-thienyl)methylene]-2(5H)-furanone           | 193.029 | HMDB33845 | 0,0410083 |
| 13-HDoHE                                                       | 315.264 | HMDB60043 | 0,0407911 |
| Trigoforin                                                     | 189.091 | HMDB29495 | 0,0407383 |
| Verimol B                                                      | 317.139 | HMDB38323 | 0,0406362 |
| Glycerol 1-propanoate diacetate                                | 231.087 | HMDB31640 | 0,0389345 |
| (Z)-[3-(Methylsulfinyl)-1-propenyl] 2-propenyl disulfide       | 209.013 | HMDB32653 | 0,0382957 |
| (2R*,3R*)-1,2,3-Butanetriol                                    | 107.071 | HMDB34778 | 0,0378536 |
| Metaxalone                                                     | 222.113 | HMDB14798 | 0,0368016 |
| Cinnassiol D2 glucoside                                        | 531.275 | HMDB34679 | 0,0365703 |
| 1-(4-Methoxyphenyl)-1-penten-3-one                             | 191.107 | HMDB30905 | 0,0346418 |
| Dimethylbenzyl carbonyl hexanoate                              | 249.185 | HMDB32228 | 0,03309   |
| Vanilloside                                                    | 315.109 | HMDB32013 | 0,0327461 |
| Elenolide                                                      | 223.061 | HMDB30018 | 0,0327129 |
| Barbituric acid                                                | 127.014 | HMDB41833 | 0,0318121 |
| Galactosylglycerol                                             | 253.093 | HMDB06790 | 0,0313474 |
| (1R,3S,4S,6R)-6,9-Dihydroxyfenchone 6-O-b-D-glucoside          | 345.156 | HMDB33222 | 0,0304542 |
| Pyruvatoxime                                                   | 102.018 | HMDB02455 | 0,0271757 |
| 12S-HHT                                                        | 281.209 | HMDB12535 | 0,0269099 |
| Phenylacetic acid                                              | 137.06  | HMDB00209 | 0,021672  |
| (Z)-1-(Methylthio)-5-phenyl-1-penten-3-yne                     | 189.073 | HMDB32688 | 0,0215873 |
| Linocinnamarin                                                 | 341.119 | HMDB30678 | 0,0207849 |

|                                                                      |         |           |            |
|----------------------------------------------------------------------|---------|-----------|------------|
| <b>3-[[5-Methyl-2-(1-methylethyl)cyclohexyl]oxy]-1,2-propanediol</b> | 229.18  | HMDB36133 | 0,0198932  |
| <b>5-Aminopentanamide</b>                                            | 117.103 | HMDB12176 | 0,0175487  |
| <b>Methyl 7-epi-12-hydroxyjasmonate glucoside</b>                    | 401.182 | HMDB31763 | 0,0130457  |
| <b>Homoveratric acid</b>                                             | 195.066 | HMDB00434 | 0,00734863 |
